# Supplementary material for: Gene expression-based clinical predictions in lung adenocarcinoma
Source: Aging (Albany NY). 2020 Aug 5;12(15):15492–503. doi: 10.18632/aging.103721 (PMC7467359; doi:10.18632/aging.103721)
Supplement: Supplementary Figures [file aging-12-103721-s003..pdf]

## SUPPLEMENTARY FIGURE

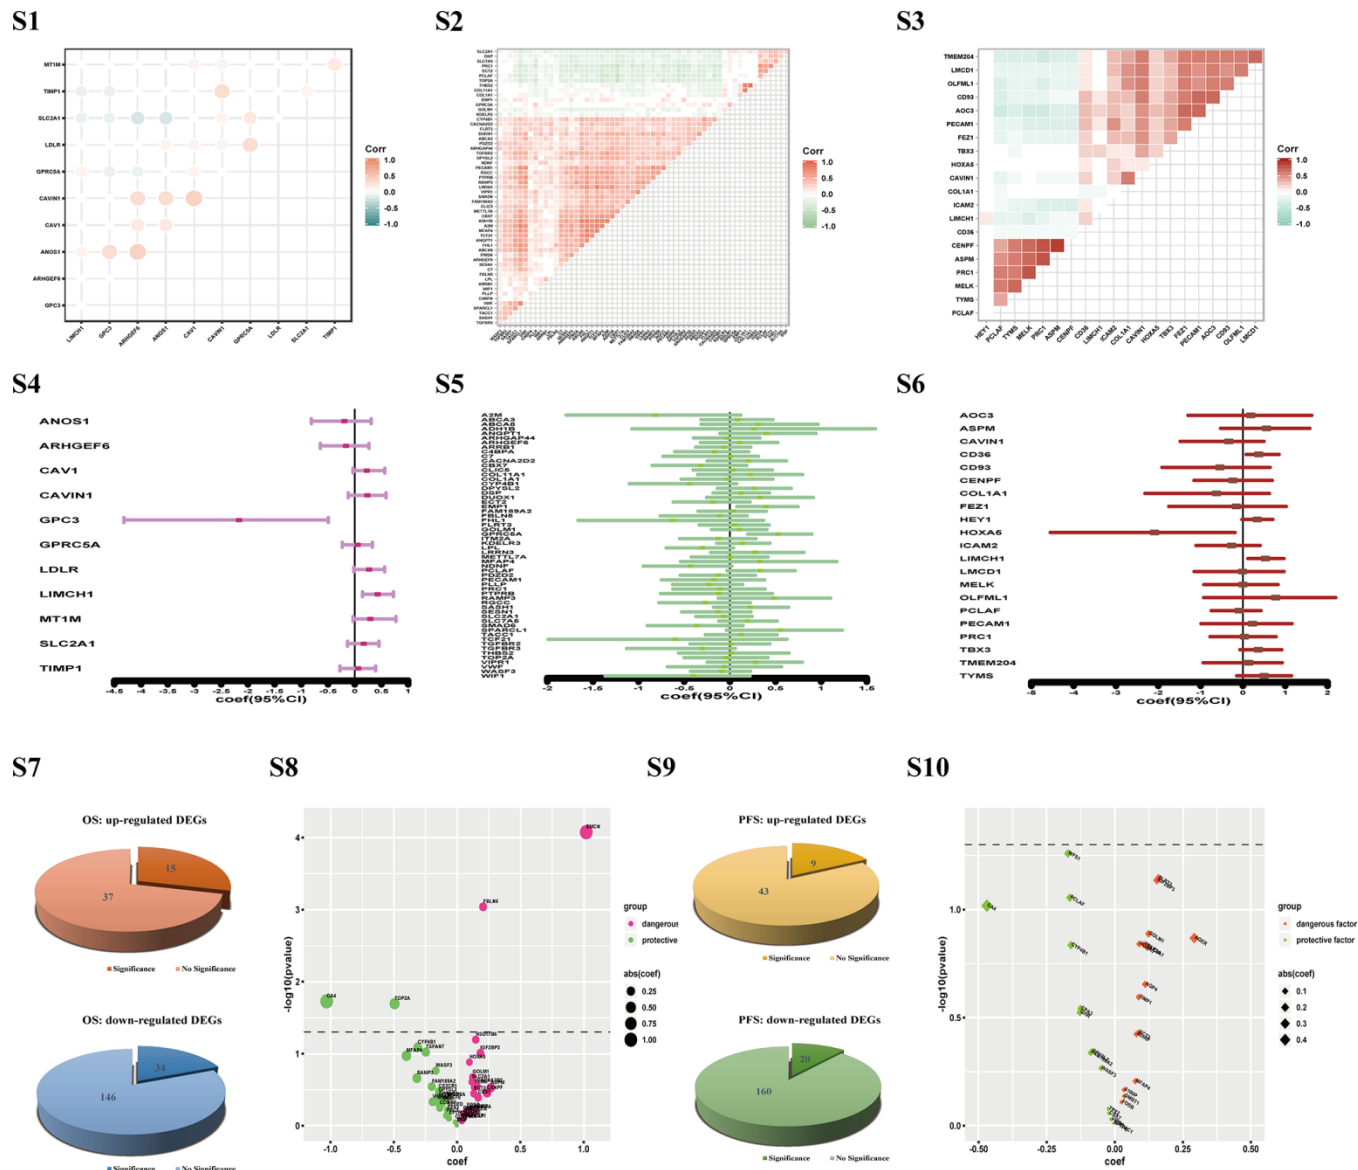

**Supplementary Figure.** (S1) (S2) (S3) correlation analysis for preliminarily filtrated DEGs for TNM parameters respectively; (S4) (S5) (S6) coef and 95% CI of the preliminary multivariate logistic regression models of TNM parameters respectively; (S7) screened OS-related DEGs by log-rank test ( $P < 0.05$  was considered as significance); (S8) coef and p value of OS-related genes in the preliminary Cox proportional hazard regression model; (S9) sifted PFS-related DEGs by log-rank test ( $P < 0.05$  was regarded as significance); (S10) coef and p value of PFS-related genes in the initial Cox proportional hazard regression model. DEGs, differentially expressed genes; coef, coefficient; CI, confidence interval; OS, overall survival; PFS, progression-free survival.
