# Supplementary material for: Gene expression-based clinical predictions in lung adenocarcinoma
Source: Aging (Albany NY). 2020 Aug 5;12(15):15492–503. doi: 10.18632/aging.103721 (PMC7467359; doi:10.18632/aging.103721)
Supplement: Supplementary Table 1 [file aging-12-103721-s001..xlsx]

## Sheet: Supplementary Table 1
Supplementary Table 1. Genomic information of DEGs selected from comparison of tumor vs. normal tissues.
Chromosome	chromStart	chromEnd	GeneName
chr7	95583499	95596491	PDK4
chr17	12789539	12991643	ARHGAP44
chr3	50362799	50504244	CACNA2D2
chrX	8528874	8732186	ANOS1
chr12	12890782	12917937	GPRC5A
chr2	118942166	118994660	MARCO
chrX	136146702	136211359	FHL1
chr12	56752161	56787790	HSD17B6
chrX	150980509	150990775	HMGB3
chrX	13771031	13938638	GPM6B
chr18	58044367	58401540	NEDD4L
chr1	102876467	103108872	COL11A1
chr16	68636189	68722616	CDH3
chr4	41359607	41700044	LIMCH1
chr2	187343129	187448460	CALCRL
chr1	197084128	197146694	ASPM
chr3	137998735	138033655	CLDN18
chr14	99737693	99942060	EML1
chr10	3775996	3785281	KLF6
chr1	91680343	91906335	TGFBR3
chr3	8501707	8574673	LMCD1
chr14	52857268	52952435	FERMT2
chr3	183122213	183163839	LAMP3
chr6	12290363	12297194	EDN1
chrX	79360384	79367667	ITM2A
chr6	130839347	131063322	EPB41L2
chr6	108986437	109094819	SESN1
chr13	46053195	46105033	CPB2
chr4	74097035	74099293	CXCL2
chr19	48872392	48876057	PPP1R15A
chr20	31739271	31801805	TPX2
chr3	189956728	190122437	P3H2
chr5	116443616	116574934	SEMA6A
chr8	26514022	26658178	DPYSL2
chr1	171185208	171211230	FMO2
chr10	97865000	98030828	CRTAC1
chr6	7541575	7586717	DSP
chr22	23768226	23784316	MMP11
chr22	38468062	38483447	KDELR3
chr22	32801701	32863043	TIMP3
chr22	39120167	39152674	CBX7
chr20	46008908	46016561	MMP9
chr20	36541484	36551447	MYL9
chrX	38149336	38220924	SRPX
chrX	47582313	47586789	TIMP1
chr13	41457559	41470882	RGCC
chr16	57248547	57284687	PLLP
chr16	87830023	87869488	SLC7A5
chr8	85463852	85481493	CA2
chr19	41708585	41729798	CEACAM5
chr19	18782773	18791314	COMP
chr7	116524785	116561184	CAV1
chr7	27141052	27143668	HOXA5
chr7	16791811	16833433	AGR2
chr10	72059035	72089032	SPOCK2
chr17	30194319	30236002	SLC6A4
chr17	64002594	64020634	ICAM2
chr17	50183289	50201632	COL1A1
chr4	6269849	6303265	WFS1
chr11	111908565	111923722	CRYAB
chr11	114059593	114250676	ZBTB16
chr12	5948874	6124770	VWF
chr6	11183298	11382348	NEDD9
chr6	148272304	148552050	SASH1
chr6	143536845	143831185	PHACTR2
chr6	45880827	46080348	CLIC5
chr5	9035026	9546075	SEMA5A
chr5	40909252	40982939	C7
chr5	42423777	42721878	GHR
chr5	140332843	140346631	HBEGF
chr3	165772904	165837472	BCHE
chr3	172750682	172821474	ECT2
chr3	146192339	146251179	PLSCR4
chr3	42489299	42537573	VIPR1
chr3	52451102	52454070	TNNC1
chr2	54456285	54671445	SPTBN1
chr2	210187939	210225491	ACADL
chr2	55865967	55924139	EFEMP1
chr2	102311502	102352037	IL1RL1
chr2	46293667	46386703	EPAS1
chr1	81306160	81992436	ADGRL2
chr1	42925375	42959176	SLC2A1
chr1	43358955	43363203	CDC20
chr1	214603195	214664588	CENPF
chr6	133889138	133895553	TCF21
chr4	87975650	87983426	SPP1
chr9	108942569	109013529	CTNNAL1
chr2	47345158	47387601	EPCAM
chr5	172768090	172771195	DUSP1
chr9	27109141	27230175	TEK
chr12	93569814	93583487	SOCS2
chr11	34438925	34472062	CAT
chr7	45157791	45186302	RAMP3
chr6	116118923	116158747	COL10A1
chr1	207104262	207144972	C4BPA
chr20	45252239	45254564	SLPI
chr19	45467995	45475179	FOSB
chr20	23079349	23086340	CD93
chr20	14322988	14337616	FLRT3
chr19	49635292	49640201	RRAS
chr12	70515866	70637440	PTPRB
chr7	93921699	93928610	GNG11
chr19	39406813	39409412	ZFP36
chr5	115804733	115816954	CDO1
chrX	136665547	136782088	ARHGEF6
chr19	11089362	11133816	LDLR
chr19	18374731	18389176	GDF15
chr17	44846353	44850480	HIGD1B
chr17	42851184	42858130	AOC3
chr17	42758447	42763041	RAMP2
chr16	1528688	1555580	TMEM204
chr17	40388516	40417950	TOP2A
chr13	26557703	26688948	WASF3
chr17	8474205	8630761	MYH10
chr13	33103135	33350630	STARD13
chr5	31639410	32110931	PDZD2
chr10	79937740	79982614	SFTPD
chr11	10556966	10611689	LYVE1
chr12	13196716	13219939	EMP1
chr11	59852800	59866575	TCN1
chr9	86026146	86100173	GOLM1
chr9	69324567	69392558	FAM189A2
chr12	114670254	114684164	TBX3
chr7	80369575	80679277	CD36
chr13	75620434	75859870	LMO7
chr13	77895481	77975529	EDNRB
chr7	23310209	23470467	IGF2BP3
chr7	22725884	22732002	IL6
chr9	107484852	107490482	KLF4
chr9	6215786	6257983	IL33
chr6	10393186	10419659	TFAP2A
chr11	75264182	75351705	ARRB1
chr11	76657524	76670747	LRRC32
chr8	69466624	69660915	SULF1
chr11	118077012	118121890	TMPRSS4
chr15	66702228	66782848	SMAD6
chr15	45129933	45165576	DUOX1
chr4	78551519	78610451	ANXA3
chr4	102251041	102431258	SLC39A8
chr14	91869412	91947987	FBLN5
chr15	59594875	59640239	GCNT3
chr17	68867292	68955392	ABCA8
chr19	281040	291504	PLPP2
chr1	27369112	27374824	FCN3
chr1	46757838	46819413	CYP4B1
chr1	156699606	156705816	CRABP2
chr1	151364302	151372733	SELENBP1
chr4	20253260	20620561	SLIT2
chr6	47231532	47309905	TNFRSF21
chr6	63275951	63319977	LGSN
chrX	34627064	34657288	TMEM47
chrX	133535745	133985895	GPC3
chr8	38728186	38853028	TACC1
chr9	128149071	128153455	LCN2
chr10	86968192	86983934	ADIRF
chr11	62405103	62423195	SCGB1A1
chr11	125442881	125592568	FEZ1
chr12	119178642	119221131	HSPB8
chr4	87473335	87531061	SPARCL1
chr2	228850526	229271285	PID1
chr8	107249482	107498055	ANGPT1
chr21	25639272	25717562	JAM2
chr21	26835747	26845409	ADAMTS1
chrX	66021738	66040125	VSIG4
chr12	65050626	65121566	WIF1
chrX	38561370	38688920	TSPAN7
chr8	37858618	37899467	RAB11FIP1
chr15	59105078	59125045	CCNB2
chr16	67389809	67393535	TPPP3
chr3	30606502	30694142	TGFBR2
chr3	142815922	142889206	PCOLCE2
chr3	148865256	148897196	CPA3
chr4	6693069	6697170	S100P
chr4	100395341	100880126	EMCN
chr5	147824568	147831786	SPINK1
chr8	79764010	79767863	HEY1
chr9	36572862	36677683	MELK
chr17	55719627	55732121	TMEM100
chr17	19383442	19387240	MFAP4
chr15	64364311	64387687	PCLAF
chr17	60149936	60170899	CA4
chr16	2275881	2340746	ABCA3
chr3	58564117	58627610	FAM107A
chr3	39263494	39281735	CX3CR1
chr8	22156913	22164479	SFTPC
chr2	191834302	191847255	CAVIN2
chr2	188974320	189012746	COL3A1
chr5	35852695	35879603	IL7R
chr14	24809656	25050297	STXBP6
chr4	16501541	16898809	LDB2
chr8	81478419	81483263	FABP4
chr14	75278774	75282230	FOS
chr20	23747553	23751268	CST1
chr12	120322111	120327789	PLA2G1B
chr1	101236865	101243713	S1PR1
chr7	16461481	16530580	SOSTDC1
chr18	26852038	26865818	AQP4
chr7	111091006	111125454	LRRN3
chr4	121035613	121073021	NDNF
chr12	10158301	10172138	OLR1
chr3	124965710	125055958	HEG1
chr1	207880972	207911402	CD34
chr3	133928145	134052184	SLCO2A1
chr2	219418377	219426739	DES
chr8	19901717	19967259	LPL
chr12	9067664	9116229	A2M
chr18	657604	673578	TYMS
chr17	42402452	42423517	CAVIN1
chr16	66366622	66404786	CDH5
chr16	69706996	69726951	NQO1
chr19	8848844	8981342	MUC16
chr21	39867317	39929397	PCP4
chr13	39209116	39603528	LHFPL6
chr11	7485388	7511377	OLFML1
chr3	93873033	93980003	PROS1
chr12	50923472	50932517	METTL7A
chr6	169215780	169254044	THBS2
chr10	122560665	122643736	DMBT1
chr3	155024124	155183729	MME
chr4	99304964	99352760	ADH1B
chr21	45073853	45226560	ADARB1
chr10	87659613	87747705	PAPSS2
chr10	119207589	119459742	GRK5
chr15	90966038	90995629	PRC1
chr6	32180968	32184324	AGER
chr16	56632233	56633986	MT1M
chr6	31945650	31952084	CFB
chr11	5225464	5229395	HBB
chr17	64319415	64413776	PECAM1
chr11	102862736	102875034	MMP12
chr6	106969831	106975627	CD24
chr13	71437966	71867192	DACH1
