# Supplementary material for: Gene expression-based clinical predictions in lung adenocarcinoma
Source: Aging (Albany NY). 2020 Aug 5;12(15):15492–503. doi: 10.18632/aging.103721 (PMC7467359; doi:10.18632/aging.103721)
Supplement: Supplementary Table 2 [file aging-12-103721-s002..xlsx]

## Sheet: GO-enrich
Supplementary Table 2. Results of GO analysis and pathway enrichment analysis of DEGs.
Gene_Ontology												Pathway
ONTOLOGY	ID	Description	GeneRatio	BgRatio	pvalue	p.adjust	qvalue	geneID	Count			ID	Description	GeneRatio	BgRatio	pvalue	p.adjust	qvalue	geneID	Count
BP	GO:0043062	extracellular structure organization	28/228	395/17653	2.49e-13	8.61e-10	6.76e-10	A2M/CD34/CD36/COL10A1/COL11A1/COL1A1/COL3A1/COMP/CPB2/FBLN5/GPM6B/ICAM2/JAM2/LPL/MFAP4/MMP11/MMP12/MMP9/NDNF/PECAM1/RAMP2/RGCC/SPOCK2/SPP1/SULF1/THBS2/TIMP1/VWF	28			hsa04610	Complement and coagulation cascades	8/129	79/7470	5.94e-05	0.0123496	0.0116246	2/722/730/629/1361/5627/11326/7450	8
BP	GO:0030198	extracellular matrix organization	25/228	341/17653	2.47e-12	4.27e-09	3.35e-09	A2M/COL10A1/COL11A1/COL1A1/COL3A1/COMP/CPB2/FBLN5/GPM6B/ICAM2/JAM2/MFAP4/MMP11/MMP12/MMP9/NDNF/PECAM1/RAMP2/RGCC/SPOCK2/SPP1/SULF1/THBS2/TIMP1/VWF	25			hsa05144	Malaria	6/129	49/7470	0.000179604	0.0186788	0.0175823	948/1311/3043/3569/5175/7058	6
BP	GO:0001822	kidney development	20/228	264/17653	2.39e-10	2.76e-07	2.17e-07	ADAMTS1/ANGPT1/CA2/CAT/CD24/CD34/CENPF/EPCAM/GCNT3/GPC3/MME/PECAM1/SLIT2/SMAD6/SULF1/TCF21/TEK/TFAP2A/WFS1/ZBTB16	20			hsa04926	Relaxin signaling pathway	9/129	130/7470	0.000390947	0.0271056	0.0255144	408/1277/1281/1906/1910/2353/2791/4318/7048	9
BP	GO:0072001	renal system development	20/228	280/17653	6.75e-10	5.85e-07	4.59e-07	ADAMTS1/ANGPT1/CA2/CAT/CD24/CD34/CENPF/EPCAM/GCNT3/GPC3/MME/PECAM1/SLIT2/SMAD6/SULF1/TCF21/TEK/TFAP2A/WFS1/ZBTB16	20			hsa04974	Protein digestion and absorption	7/129	90/7470	0.000885277	0.0460344	0.043332	1300/1301/1277/1281/1359/1361/4311	7
BP	GO:0031960	response to corticosteroid	15/228	160/17653	2.51e-09	1.74e-06	1.36e-06	ABCA3/ANXA3/BCHE/CDO1/COL1A1/DUSP1/EDN1/FOS/FOSB/HEY1/IL6/SCGB1A1/SLIT2/TYMS/ZFP36	15			R-HSA-1474244	Extracellular matrix organization	21/169	300/10561	1.22e-08	6.32e-06	5.8e-06	A2M/ADAMTS1/COL10A1/COL11A1/COL1A1/COL3A1/COMP/EFEMP1/FBLN5/ICAM2/JAM2/MFAP4/MMP11/MMP12/MMP9/P3H2/PCOLCE2/PECAM1/SPP1/TIMP1/VWF	21
BP	GO:0051384	response to glucocorticoid	14/228	143/17653	4.92e-09	2.7e-06	2.12e-06	ABCA3/ANXA3/BCHE/CDO1/DUSP1/EDN1/FOS/FOSB/HEY1/IL6/SCGB1A1/SLIT2/TYMS/ZFP36	14			R-HSA-202733	Cell surface interactions at the vascular wall	12/169	137/10561	1.88e-06	0.000487978	0.000447478	ANGPT1/CAV1/CEACAM5/COL1A1/EPCAM/JAM2/OLR1/PECAM1/PROS1/SLC7A5/TEK/TSPAN7	12
BP	GO:0001655	urogenital system development	20/228	316/17653	5.46e-09	2.7e-06	2.12e-06	ADAMTS1/ANGPT1/CA2/CAT/CD24/CD34/CENPF/EPCAM/GCNT3/GPC3/MME/PECAM1/SLIT2/SMAD6/SULF1/TCF21/TEK/TFAP2A/WFS1/ZBTB16	20			R-HSA-216083	Integrin cell surface interactions	9/169	85/10561	8.08e-06	0.00139975	0.00128357	COL10A1/COL1A1/COL3A1/COMP/ICAM2/JAM2/PECAM1/SPP1/VWF	9
BP	GO:0048545	response to steroid hormone	21/228	391/17653	3.94e-08	1.51e-05	1.18e-05	ABCA3/ANXA3/BCHE/CA2/CAV1/CDO1/COL1A1/DUSP1/EDN1/FOS/FOSB/HEY1/IL6/RAMP2/SCGB1A1/SLIT2/SPP1/TCF21/TGFBR2/TYMS/ZFP36	21			R-HSA-1474228	Degradation of the extracellular matrix	11/169	139/10561	1.36e-05	0.0017621	0.00161585	A2M/ADAMTS1/COL10A1/COL11A1/COL1A1/COL3A1/MMP11/MMP12/MMP9/SPP1/TIMP1	11
BP	GO:0072593	reactive oxygen species metabolic process	17/228	256/17653	3.97e-08	1.51e-05	1.18e-05	CAT/CAV1/CD34/CD36/CRYAB/DUOX1/EDN1/FBLN5/HBB/KLF4/NQO1/PDK4/PID1/SESN1/SFTPD/TFAP2A/TGFBR2	17			R-HSA-1442490	Collagen degradation	7/169	64/10561	6.84e-05	0.00711802	0.00652726	COL10A1/COL11A1/COL1A1/COL3A1/MMP11/MMP12/MMP9	7
BP	GO:0000302	response to reactive oxygen species	16/228	227/17653	4.41e-08	1.51e-05	1.18e-05	CAT/CD36/COL1A1/CRYAB/DUSP1/ECT2/EDN1/FBLN5/FOS/HBB/IL6/KLF4/MMP9/NQO1/SCGB1A1/SESN1	16			R-HSA-5683826	Surfactant metabolism	5/169	30/10561	0.000101919	0.00883297	0.00809987	ABCA3/DMBT1/LMCD1/SFTPC/SFTPD	5
BP	GO:0050900	leukocyte migration	23/228	470/17653	4.79e-08	1.51e-05	1.18e-05	ANGPT1/CAV1/CD34/CEACAM5/COL1A1/CX3CR1/CXCL2/EDN1/EDNRB/EPCAM/IL33/IL6/JAM2/MMP9/OLR1/PECAM1/PLA2G1B/PROS1/S1PR1/SFTPD/SLC7A5/SLIT2/TEK	23			R-HSA-166658	Complement cascade	6/169	58/10561	0.000312339	0.0232023	0.0212766	C4BPA/C7/CFB/CPB2/FCN3/PROS1	6
BP	GO:0001818	negative regulation of cytokine production	16/228	245/17653	1.27e-07	3.66e-05	2.87e-05	AGER/ANGPT1/ARRB1/CD24/CD34/CDH3/IL1RL1/IL33/IL6/KLF4/LRRC32/RGCC/SCGB1A1/SFTPD/TNFRSF21/ZFP36	16			R-HSA-419812	Calcitonin-like ligand receptors	3/169	10/10561	0.000444753	0.0274823	0.0252013	CALCRL/RAMP2/RAMP3	3
BP	GO:1901342	regulation of vasculature development	20/228	396/17653	2.27e-07	6.06e-05	4.75e-05	ANXA3/CD34/CDH5/CX3CR1/HEY1/HOXA5/IL6/KLF4/RAMP2/RGCC/RRAS/SASH1/SEMA5A/SEMA6A/STARD13/SULF1/TEK/TGFBR2/THBS2/TMEM100	20			R-HSA-2173782	Binding and Uptake of Ligands by Scavenger Receptors	5/169	42/10561	0.000521094	0.0274823	0.0252013	CD36/COL1A1/COL3A1/HBB/MARCO	5
BP	GO:0001101	response to acid chemical	18/228	329/17653	2.92e-07	7.23e-05	5.67e-05	BCHE/CAT/CD36/CDO1/COL1A1/COL3A1/DUSP1/EDN1/KLF4/LDLR/NQO1/PDK4/PID1/SCGB1A1/SESN1/SLC6A4/TGFBR3/TYMS	18			R-HSA-373755	Semaphorin interactions	6/169	65/10561	0.000581289	0.0274823	0.0252013	DPYSL2/MYH10/MYL9/RRAS/SEMA5A/SEMA6A	6
BP	GO:0050878	regulation of body fluid levels	22/228	499/17653	5.68e-07	0.000112369	8.82e-05	A2M/AGR2/AQP4/ARRB1/CAV1/CD34/CD36/CDO1/COL1A1/COL3A1/CPB2/EDN1/EDNRB/HBB/HEG1/IL6/MYL9/PAPSS2/PROS1/SOCS2/VWF/WFS1	22			R-HSA-1474290	Collagen formation	7/169	90/10561	0.000581355	0.0274823	0.0252013	COL10A1/COL11A1/COL1A1/COL3A1/MMP9/P3H2/PCOLCE2	7
BP	GO:1904035	regulation of epithelial cell apoptotic process	9/228	76/17653	5.74e-07	0.000112369	8.82e-05	ANGPT1/IL6/NDNF/RAMP2/RGCC/SEMA5A/TEK/WFS1/ZFP36	9			R-HSA-1650814	Collagen biosynthesis and modifying enzymes	6/169	67/10561	0.000684084	0.0296436	0.0271833	COL10A1/COL11A1/COL1A1/COL3A1/P3H2/PCOLCE2	6
BP	GO:1904019	epithelial cell apoptotic process	10/228	99/17653	6.06e-07	0.000112369	8.82e-05	ANGPT1/IL6/NDNF/RAMP2/RGCC/SEMA5A/TEK/TGFBR2/WFS1/ZFP36	10			R-HSA-5687613	Diseases associated with surfactant metabolism	3/169	12/10561	0.000796368	0.0318547	0.0292109	ABCA3/SFTPC/SFTPD	3
BP	GO:0003206	cardiac chamber morphogenesis	11/228	124/17653	6.17e-07	0.000112369	8.82e-05	ADAMTS1/COL11A1/DSP/HEG1/HEY1/SMAD6/TBX3/TEK/TGFBR2/TGFBR3/TNNC1	11			R-HSA-977606	Regulation of Complement cascade	5/169	47/10561	0.000881086	0.032726	0.0300099	C4BPA/C7/CFB/CPB2/PROS1	5
BP	GO:0032963	collagen metabolic process	11/228	124/17653	6.17e-07	0.000112369	8.82e-05	COL10A1/COL11A1/COL1A1/COL3A1/IL6/MFAP4/MMP11/MMP12/MMP9/P3H2/RGCC	11			R-HSA-1237044	Erythrocytes take up carbon dioxide and release oxygen	3/169	13/10561	0.00102315	0.0329033	0.0301725	CA2/CA4/HBB	3
BP	GO:0045765	regulation of angiogenesis	18/228	366/17653	1.37e-06	0.000237168	0.000186067	ANXA3/CD34/CDH5/CX3CR1/HOXA5/IL6/KLF4/RAMP2/RGCC/RRAS/SASH1/SEMA5A/SEMA6A/STARD13/SULF1/TEK/TGFBR2/THBS2	18			R-HSA-1480926	O2/CO2 exchange in erythrocytes	3/169	13/10561	0.00102315	0.0329033	0.0301725	CA2/CA4/HBB	3
BP	GO:0050727	regulation of inflammatory response	19/228	411/17653	1.74e-06	0.000286185	0.000224522	A2M/AGER/C4BPA/C7/CALCRL/CDH5/CFB/CPB2/EDNRB/FABP4/IL1RL1/IL33/IL6/KLF4/LDLR/LPL/PROS1/SCGB1A1/TEK	19			R-HSA-114608	Platelet degranulation	8/169	129/10561	0.00107569	0.0329033	0.0301725	A2M/CD36/PECAM1/PHACTR2/PROS1/TIMP1/TIMP3/VWF	8
BP	GO:0010466	negative regulation of peptidase activity	15/228	264/17653	1.84e-06	0.000289639	0.000227232	A2M/ANOS1/ARRB1/CRYAB/CST1/GPC3/KLF4/LAMP3/MMP9/PROS1/SLPI/SPINK1/SPOCK2/TIMP1/TIMP3	15			R-HSA-76005	Response to elevated platelet cytosolic Ca2+	8/169	134/10561	0.00137481	0.0397168	0.0364205	A2M/CD36/PECAM1/PHACTR2/PROS1/TIMP1/TIMP3/VWF	8
BP	GO:0002683	negative regulation of immune system process	19/228	426/17653	2.93e-06	0.000427299	0.000335231	A2M/ANGPT1/C4BPA/CLDN18/COL3A1/HMGB3/HOXA5/IL1RL1/IL33/IL7R/LDLR/LRRC32/MMP12/SCGB1A1/SFTPD/SLIT2/TNFRSF21/ZBTB16/ZFP36	19			R-HSA-6785807	Interleukin-4 and 13 signaling	7/169	108/10561	0.00170706	0.0443835	0.0406998	CD36/FOS/IL6/LCN2/MMP9/S1PR1/TIMP1	7
BP	GO:0061383	trabecula morphogenesis	7/228	49/17653	2.96e-06	0.000427299	0.000335231	ADAMTS1/COL1A1/HEG1/HEY1/S1PR1/TEK/TGFBR3	7			R-HSA-8957275	Post-translational protein phosphorylation	7/169	108/10561	0.00170706	0.0443835	0.0406998	GOLM1/GPC3/IL6/SPARCL1/SPP1/TIMP1/WFS1	7
BP	GO:0045861	negative regulation of proteolysis	17/228	352/17653	3.46e-06	0.000479897	0.000376496	A2M/ANOS1/ARRB1/C4BPA/CPB2/CRYAB/CST1/GPC3/KLF4/LAMP3/MMP9/PROS1/SLPI/SPINK1/SPOCK2/TIMP1/TIMP3	17
BP	GO:0006979	response to oxidative stress	19/228	436/17653	4.11e-06	0.000547022	0.000429157	CAT/CD36/COL1A1/CRYAB/DUOX1/DUSP1/ECT2/EDN1/EPAS1/FBLN5/FOS/HBB/IL6/KLF4/MELK/MMP9/NQO1/SCGB1A1/SESN1	19
BP	GO:0061384	heart trabecula morphogenesis	6/228	34/17653	4.32e-06	0.00055403	0.000434656	ADAMTS1/HEG1/HEY1/S1PR1/TEK/TGFBR3	6
BP	GO:0010951	negative regulation of endopeptidase activity	14/228	251/17653	5.06e-06	0.00062583	0.000490985	A2M/ANOS1/ARRB1/CRYAB/CST1/KLF4/LAMP3/MMP9/PROS1/SLPI/SPINK1/SPOCK2/TIMP1/TIMP3	14
BP	GO:0006959	humoral immune response	16/228	329/17653	6.19e-06	0.00072138	0.000565947	A2M/C4BPA/C7/CFB/CPB2/DMBT1/FCN3/IL6/LCN2/PLA2G1B/PROS1/RGCC/SFTPD/SLPI/TNFRSF21/VSIG4	16
BP	GO:1901652	response to peptide	20/228	491/17653	6.25e-06	0.00072138	0.000565947	AGER/CA2/CAT/CAV1/CD36/CDO1/COL1A1/EDN1/EDNRB/GHR/GNG11/KLF4/PDK4/PID1/PLA2G1B/SLC2A1/SOCS2/TEK/TGFBR3/TIMP1	20
BP	GO:0003205	cardiac chamber development	11/228	158/17653	6.68e-06	0.000745881	0.000585169	ADAMTS1/COL11A1/DSP/HEG1/HEY1/SMAD6/TBX3/TEK/TGFBR2/TGFBR3/TNNC1	11
BP	GO:0045124	regulation of bone resorption	6/228	37/17653	7.23e-06	0.000774527	0.000607643	CA2/CLDN18/IL6/PDK4/S1PR1/SPP1	6
BP	GO:0001570	vasculogenesis	8/228	78/17653	7.38e-06	0.000774527	0.000607643	CAV1/CD34/HEG1/HEY1/RAMP2/TGFBR2/TGFBR3/TMEM100	8
BP	GO:1903034	regulation of response to wounding	11/228	161/17653	7.99e-06	0.00081408	0.000638673	AGER/CAV1/CD34/CD36/CPB2/EDN1/HBEGF/KLF4/PROS1/SPP1/TGFBR2	11
BP	GO:0072012	glomerulus vasculature development	5/228	23/17653	9.57e-06	0.000942148	0.000739148	ANGPT1/CD34/PECAM1/TCF21/TEK	5
BP	GO:0060415	muscle tissue morphogenesis	8/228	81/17653	9.79e-06	0.000942148	0.000739148	ADARB1/COL11A1/COL3A1/DSP/HEG1/S1PR1/TGFBR3/TNNC1	8
BP	GO:0032835	glomerulus development	7/228	61/17653	1.32e-05	0.00122044	0.000957481	ANGPT1/CD24/CD34/PECAM1/SULF1/TCF21/TEK	7
BP	GO:1904036	negative regulation of epithelial cell apoptotic process	6/228	41/17653	1.34e-05	0.00122044	0.000957481	ANGPT1/NDNF/RAMP2/SEMA5A/TEK/WFS1	6
BP	GO:0061437	renal system vasculature development	5/228	25/17653	1.48e-05	0.00128135	0.00100526	ANGPT1/CD34/PECAM1/TCF21/TEK	5
BP	GO:0061440	kidney vasculature development	5/228	25/17653	1.48e-05	0.00128135	0.00100526	ANGPT1/CD34/PECAM1/TCF21/TEK	5
BP	GO:2000377	regulation of reactive oxygen species metabolic process	11/228	173/17653	1.58e-05	0.0013329	0.0010457	CAV1/CD34/CD36/CRYAB/EDN1/FBLN5/HBB/KLF4/PID1/TFAP2A/TGFBR2	11
BP	GO:0048644	muscle organ morphogenesis	8/228	87/17653	1.67e-05	0.00136359	0.00106978	ADARB1/COL11A1/COL3A1/DSP/HEG1/S1PR1/TGFBR3/TNNC1	8
BP	GO:0003007	heart morphogenesis	13/228	243/17653	1.72e-05	0.00136359	0.00106978	ADAMTS1/COL11A1/DSP/HEG1/HEY1/S1PR1/SMAD6/TBX3/TEK/TGFBR2/TGFBR3/TMEM100/TNNC1	13
BP	GO:0007517	muscle organ development	17/228	398/17653	1.73e-05	0.00136359	0.00106978	ADARB1/CAV1/CENPF/COL11A1/COL3A1/CRYAB/DSP/EDN1/FHL1/FOS/HBEGF/HEG1/S1PR1/TCF21/TGFBR2/TGFBR3/TNNC1	17
BP	GO:0031589	cell-substrate adhesion	15/228	319/17653	1.81e-05	0.00136505	0.00107093	AGR2/ANGPT1/CD34/CD36/COL1A1/COL3A1/FBLN5/FERMT2/GPM6B/LYVE1/NDNF/SMAD6/SPOCK2/TEK/VWF	15
BP	GO:0060343	trabecula formation	5/228	26/17653	1.81e-05	0.00136505	0.00107093	ADAMTS1/COL1A1/HEY1/TEK/TGFBR3	5
BP	GO:0001501	skeletal system development	19/228	493/17653	2.32e-05	0.00164381	0.00128963	CLDN18/COL10A1/COL11A1/COL1A1/COL3A1/COMP/EDN1/EFEMP1/HOXA5/MMP9/PAPSS2/SULF1/TBX3/TEK/TFAP2A/TGFBR2/TIMP1/TYMS/ZBTB16	19
BP	GO:0046850	regulation of bone remodeling	6/228	45/17653	2.32e-05	0.00164381	0.00128963	CA2/CLDN18/IL6/PDK4/S1PR1/SPP1	6
BP	GO:0046677	response to antibiotic	15/228	326/17653	2.33e-05	0.00164381	0.00128963	AOC3/CAT/CDO1/CLDN18/COL1A1/CRYAB/DUSP1/ECT2/EDN1/HBB/IL6/KLF4/NQO1/SCGB1A1/TYMS	15
BP	GO:1904018	positive regulation of vasculature development	12/228	215/17653	2.4e-05	0.00164439	0.00129008	ANXA3/CD34/CDH5/CX3CR1/KLF4/RAMP2/RRAS/SASH1/SEMA5A/TEK/TGFBR2/TMEM100	12
BP	GO:2001212	regulation of vasculogenesis	4/228	14/17653	2.45e-05	0.00164439	0.00129008	CD34/HEY1/RAMP2/TMEM100	4
BP	GO:0032103	positive regulation of response to external stimulus	14/228	289/17653	2.48e-05	0.00164439	0.00129008	AGER/CPB2/CXCL2/EDN1/FABP4/IL1RL1/IL33/IL6/LDLR/LPL/S1PR1/SASH1/SEMA5A/SLIT2	14
BP	GO:1901654	response to ketone	11/228	183/17653	2.66e-05	0.00164439	0.00129008	CAV1/DUSP1/EDN1/FOS/FOSB/KLF4/RAMP2/SLIT2/SPP1/TGFBR3/TYMS	11
BP	GO:0006898	receptor-mediated endocytosis	15/228	330/17653	2.68e-05	0.00164439	0.00129008	AGER/ANGPT1/ARRB1/CALCRL/CAV1/CD36/DMBT1/HBB/LDLR/MARCO/RAMP2/RAMP3/SFTPD/TGFBR2/TMPRSS4	15
BP	GO:0030574	collagen catabolic process	7/228	68/17653	2.71e-05	0.00164439	0.00129008	COL10A1/COL11A1/COL1A1/COL3A1/MMP11/MMP12/MMP9	7
BP	GO:0044706	multi-multicellular organism process	12/228	218/17653	2.75e-05	0.00164439	0.00129008	CLIC5/EDN1/FOS/FOSB/MMP9/RAMP2/SCGB1A1/SLC2A1/SLC6A4/SPP1/TGFBR2/TIMP1	12
BP	GO:0003231	cardiac ventricle development	9/228	121/17653	2.76e-05	0.00164439	0.00129008	COL11A1/DSP/HEG1/HEY1/SMAD6/TBX3/TGFBR2/TGFBR3/TNNC1	9
BP	GO:0051346	negative regulation of hydrolase activity	18/228	456/17653	2.8e-05	0.00164439	0.00129008	A2M/ANOS1/ARRB1/CRYAB/CST1/GPC3/KLF4/LAMP3/MMP9/PHACTR2/PPP1R15A/PROS1/SLIT2/SLPI/SPINK1/SPOCK2/TIMP1/TIMP3	18
BP	GO:0051216	cartilage development	11/228	184/17653	2.8e-05	0.00164439	0.00129008	COL11A1/COL1A1/COMP/EDN1/EFEMP1/HOXA5/SULF1/TGFBR2/TIMP1/TYMS/ZBTB16	11
BP	GO:0006809	nitric oxide biosynthetic process	7/228	69/17653	2.99e-05	0.00172479	0.00135316	CAV1/CD34/CD36/EDN1/HBB/KLF4/NQO1	7
BP	GO:0010038	response to metal ion	15/228	334/17653	3.08e-05	0.00174818	0.00137151	CA2/CAT/CAV1/DUSP1/ECT2/EDN1/FABP4/FOS/FOSB/MMP9/MT1M/NEDD4L/NQO1/TFAP2A/TNNC1	15
BP	GO:0048871	multicellular organismal homeostasis	15/228	335/17653	3.19e-05	0.00178025	0.00139667	ACADL/AQP4/CA2/CD34/CDH3/CLDN18/EDNRB/EPAS1/IL6/LDB2/PDK4/S1PR1/SFTPD/SPP1/WFS1	15
BP	GO:0060347	heart trabecula formation	4/228	15/17653	3.31e-05	0.00181849	0.00142666	ADAMTS1/HEY1/TEK/TGFBR3	4
BP	GO:0070482	response to oxygen levels	16/228	378/17653	3.43e-05	0.00185689	0.0014568	AGER/CAT/CAV1/CD24/CD34/COL1A1/CRYAB/EDN1/EPAS1/NDNF/RAMP2/RGCC/SLC6A4/TEK/TGFBR2/TGFBR3	16
BP	GO:0032355	response to estradiol	9/228	125/17653	3.57e-05	0.00190041	0.00149093	CAT/COL1A1/CRYAB/DUSP1/NQO1/RAMP2/RAMP3/SLC6A4/SOCS2	9
BP	GO:0007596	blood coagulation	15/228	341/17653	3.91e-05	0.00203399	0.00159573	A2M/ARRB1/CAV1/CD34/CD36/COL1A1/COL3A1/CPB2/EDN1/HBB/IL6/MYL9/PAPSS2/PROS1/VWF	15
BP	GO:0042136	neurotransmitter biosynthetic process	8/228	98/17653	3.97e-05	0.00203399	0.00159573	CAV1/CD34/CD36/EDN1/HBB/KLF4/NQO1/SLC6A4	8
BP	GO:0050708	regulation of protein secretion	17/228	426/17653	4.09e-05	0.00203399	0.00159573	ANGPT1/ARRB1/CACNA2D2/CD34/IL1RL1/IL33/IL6/LPL/LRRC32/MMP12/MYH10/PLA2G1B/RAB11FIP1/RGCC/SLC2A1/SPTBN1/TNFRSF21	17
BP	GO:0043434	response to peptide hormone	17/228	427/17653	4.21e-05	0.00203399	0.00159573	CA2/CAT/CAV1/CDO1/COL1A1/EDN1/EDNRB/GHR/GNG11/PDK4/PID1/PLA2G1B/SLC2A1/SOCS2/TEK/TGFBR3/TIMP1	17
BP	GO:2000351	regulation of endothelial cell apoptotic process	6/228	50/17653	4.3e-05	0.00203399	0.00159573	ANGPT1/NDNF/RAMP2/RGCC/SEMA5A/TEK	6
BP	GO:0003208	cardiac ventricle morphogenesis	7/228	73/17653	4.32e-05	0.00203399	0.00159573	COL11A1/DSP/HEG1/HEY1/TGFBR2/TGFBR3/TNNC1	7
BP	GO:0046209	nitric oxide metabolic process	7/228	73/17653	4.32e-05	0.00203399	0.00159573	CAV1/CD34/CD36/EDN1/HBB/KLF4/NQO1	7
BP	GO:0045766	positive regulation of angiogenesis	11/228	193/17653	4.34e-05	0.00203399	0.00159573	ANXA3/CD34/CDH5/CX3CR1/KLF4/RAMP2/RRAS/SASH1/SEMA5A/TEK/TGFBR2	11
BP	GO:2000352	negative regulation of endothelial cell apoptotic process	5/228	31/17653	4.44e-05	0.00203399	0.00159573	ANGPT1/NDNF/RAMP2/SEMA5A/TEK	5
BP	GO:0071560	cellular response to transforming growth factor beta stimulus	12/228	229/17653	4.46e-05	0.00203399	0.00159573	CAV1/CDH5/COL1A1/COL3A1/CX3CR1/EDN1/FERMT2/FOS/GDF15/SMAD6/TGFBR2/TGFBR3	12
BP	GO:0002237	response to molecule of bacterial origin	15/228	345/17653	4.46e-05	0.00203399	0.00159573	CD24/CD36/CX3CR1/CXCL2/DMBT1/EDN1/EDNRB/FOS/IL6/PLSCR4/SASH1/SCGB1A1/SLPI/TNFRSF21/ZFP36	15
BP	GO:0001666	response to hypoxia	15/228	346/17653	4.61e-05	0.00204822	0.0016069	AGER/CAT/CAV1/CD24/CD34/CRYAB/EDN1/EPAS1/NDNF/RAMP2/RGCC/SLC6A4/TEK/TGFBR2/TGFBR3	15
BP	GO:0007599	hemostasis	15/228	346/17653	4.61e-05	0.00204822	0.0016069	A2M/ARRB1/CAV1/CD34/CD36/COL1A1/COL3A1/CPB2/EDN1/HBB/IL6/MYL9/PAPSS2/PROS1/VWF	15
BP	GO:0051047	positive regulation of secretion	16/228	388/17653	4.69e-05	0.00205582	0.00161286	ARRB1/CD34/CPB2/EDN1/EDNRB/IL1RL1/IL33/IL6/LPL/MMP12/MYH10/PLA2G1B/RGCC/SLC6A4/SPP1/SPTBN1	16
BP	GO:0050817	coagulation	15/228	347/17653	4.77e-05	0.00206365	0.001619	A2M/ARRB1/CAV1/CD34/CD36/COL1A1/COL3A1/CPB2/EDN1/HBB/IL6/MYL9/PAPSS2/PROS1/VWF	15
BP	GO:0010632	regulation of epithelial cell migration	13/228	269/17653	4.97e-05	0.00211086	0.00165605	ANGPT1/ANXA3/EDN1/HBEGF/KLF4/MMP9/RGCC/SASH1/SEMA5A/SLIT2/STARD13/TEK/TGFBR2	13
BP	GO:0050663	cytokine secretion	11/228	196/17653	5e-05	0.00211086	0.00165605	ANGPT1/CD34/CD36/IL1RL1/IL33/LPL/LRRC32/MMP12/RGCC/SPTBN1/TNFRSF21	11
BP	GO:0046683	response to organophosphorus	9/228	131/17653	5.16e-05	0.0021524	0.00168863	CDO1/COL1A1/DUOX1/DUSP1/FOS/FOSB/SLC6A4/TEK/TYMS	9
BP	GO:0071559	response to transforming growth factor beta	12/228	233/17653	5.27e-05	0.00217336	0.00170507	CAV1/CDH5/COL1A1/COL3A1/CX3CR1/EDN1/FERMT2/FOS/GDF15/SMAD6/TGFBR2/TGFBR3	12
BP	GO:2001057	reactive nitrogen species metabolic process	7/228	76/17653	5.61e-05	0.0022855	0.00179305	CAV1/CD34/CD36/EDN1/HBB/KLF4/NQO1	7
BP	GO:0036293	response to decreased oxygen levels	15/228	354/17653	5.98e-05	0.00240682	0.00188823	AGER/CAT/CAV1/CD24/CD34/CRYAB/EDN1/EPAS1/NDNF/RAMP2/RGCC/SLC6A4/TEK/TGFBR2/TGFBR3	15
BP	GO:1903409	reactive oxygen species biosynthetic process	8/228	104/17653	6.08e-05	0.00242141	0.00189968	CAV1/CD34/CD36/DUOX1/EDN1/HBB/KLF4/NQO1	8
BP	GO:0061041	regulation of wound healing	9/228	134/17653	6.16e-05	0.00242279	0.00190076	AGER/CAV1/CD34/CD36/CPB2/EDN1/HBEGF/PROS1/TGFBR2	9
BP	GO:0052547	regulation of peptidase activity	17/228	441/17653	6.28e-05	0.00244474	0.00191798	A2M/ANOS1/ARRB1/CAV1/CRYAB/CST1/GPC3/KLF4/LAMP3/MMP9/PCOLCE2/PROS1/SLPI/SPINK1/SPOCK2/TIMP1/TIMP3	17
BP	GO:0003229	ventricular cardiac muscle tissue development	6/228	54/17653	6.69e-05	0.00257358	0.00201906	COL11A1/DSP/HEG1/TBX3/TGFBR3/TNNC1	6
BP	GO:0061448	connective tissue development	12/228	240/17653	7.01e-05	0.00266697	0.00209233	CD34/COL11A1/COL1A1/COMP/EDN1/EFEMP1/HOXA5/SULF1/TGFBR2/TIMP1/TYMS/ZBTB16	12
BP	GO:1903532	positive regulation of secretion by cell	15/228	361/17653	7.45e-05	0.00280364	0.00219955	ARRB1/CD34/CPB2/EDN1/IL1RL1/IL33/IL6/LPL/MMP12/MYH10/PLA2G1B/RGCC/SLC6A4/SPP1/SPTBN1	15
BP	GO:0051962	positive regulation of nervous system development	18/228	493/17653	7.66e-05	0.00285001	0.00223593	AGER/ASPM/CDC20/CRABP2/CX3CR1/ECT2/FEZ1/FLRT3/LRRN3/NDNF/NEDD4L/PCP4/SEMA5A/SEMA6A/SLIT2/SOCS2/THBS2/WASF3	18
BP	GO:0042542	response to hydrogen peroxide	9/228	138/17653	7.74e-05	0.00285001	0.00223593	CAT/COL1A1/CRYAB/DUSP1/ECT2/HBB/IL6/KLF4/NQO1	9
BP	GO:0085029	extracellular matrix assembly	5/228	35/17653	8.14e-05	0.00295725	0.00232006	FBLN5/GPM6B/MFAP4/RAMP2/RGCC	5
BP	GO:0050707	regulation of cytokine secretion	10/228	172/17653	8.2e-05	0.00295725	0.00232006	ANGPT1/CD34/IL1RL1/IL33/LPL/LRRC32/MMP12/RGCC/SPTBN1/TNFRSF21	10
BP	GO:0070542	response to fatty acid	7/228	81/17653	8.45e-05	0.00299395	0.00234886	CAT/CD36/EDN1/LDLR/PDK4/PID1/TGFBR3	7
BP	GO:0010631	epithelial cell migration	14/228	324/17653	8.57e-05	0.00299395	0.00234886	ANGPT1/ANXA3/EDN1/HBEGF/KLF4/MMP9/RGCC/S100P/SASH1/SEMA5A/SLIT2/STARD13/TEK/TGFBR2	14
BP	GO:0042133	neurotransmitter metabolic process	9/228	140/17653	8.65e-05	0.00299395	0.00234886	BCHE/CAV1/CD34/CD36/EDN1/HBB/KLF4/NQO1/SLC6A4	9
BP	GO:0072073	kidney epithelium development	9/228	140/17653	8.65e-05	0.00299395	0.00234886	CAT/CD24/CD34/EPCAM/GPC3/PECAM1/SLIT2/SMAD6/TCF21	9
BP	GO:0045453	bone resorption	6/228	57/17653	9.1e-05	0.00306393	0.00240376	CA2/CLDN18/IL6/PDK4/S1PR1/SPP1	6
BP	GO:0072577	endothelial cell apoptotic process	6/228	57/17653	9.1e-05	0.00306393	0.00240376	ANGPT1/NDNF/RAMP2/RGCC/SEMA5A/TEK	6
BP	GO:0002446	neutrophil mediated immunity	18/228	500/17653	9.16e-05	0.00306393	0.00240376	ANXA3/CAT/CD36/CD93/DSP/HBB/IL6/LCN2/METTL7A/MME/MMP9/OLR1/PECAM1/PLA2G1B/PTPRB/S100P/SLPI/TCN1	18
BP	GO:0002791	regulation of peptide secretion	17/228	455/17653	9.2e-05	0.00306393	0.00240376	ANGPT1/ARRB1/CACNA2D2/CD34/IL1RL1/IL33/IL6/LPL/LRRC32/MMP12/MYH10/PLA2G1B/RAB11FIP1/RGCC/SLC2A1/SPTBN1/TNFRSF21	17
BP	GO:0090132	epithelium migration	14/228	327/17653	9.45e-05	0.00311636	0.00244489	ANGPT1/ANXA3/EDN1/HBEGF/KLF4/MMP9/RGCC/S100P/SASH1/SEMA5A/SLIT2/STARD13/TEK/TGFBR2	14
BP	GO:0001894	tissue homeostasis	11/228	211/17653	9.7e-05	0.00316934	0.00248645	CA2/CD34/CDH3/CLDN18/EPAS1/IL6/LDB2/PDK4/S1PR1/SFTPD/SPP1	11
BP	GO:0045428	regulation of nitric oxide biosynthetic process	6/228	58/17653	0.000100412	0.0032498	0.00254958	CAV1/CD34/CD36/EDN1/HBB/KLF4	6
BP	GO:0090130	tissue migration	14/228	333/17653	0.00011445	0.00364771	0.00286175	ANGPT1/ANXA3/EDN1/HBEGF/KLF4/MMP9/RGCC/S100P/SASH1/SEMA5A/SLIT2/STARD13/TEK/TGFBR2	14
BP	GO:0034103	regulation of tissue remodeling	7/228	85/17653	0.000114814	0.00364771	0.00286175	AGER/CA2/CLDN18/IL6/PDK4/S1PR1/SPP1	7
BP	GO:0048661	positive regulation of smooth muscle cell proliferation	7/228	86/17653	0.000123633	0.00388528	0.00304814	CALCRL/EDN1/HBEGF/IL6/MMP9/S1PR1/TGFBR2	7
BP	GO:0007162	negative regulation of cell adhesion	12/228	255/17653	0.000124535	0.00388528	0.00304814	ANGPT1/COL1A1/EPCAM/JAM2/KLF4/LRRC32/RGCC/SCGB1A1/SEMA5A/SEMA6A/SFTPD/TNFRSF21	12
BP	GO:0007178	transmembrane receptor protein serine/threonine kinase signaling pathway	14/228	336/17653	0.000125736	0.00388771	0.00305004	CAV1/CDH5/COL3A1/FERMT2/FOS/GDF15/GPC3/SMAD6/SOSTDC1/SPTBN1/SULF1/TGFBR2/TGFBR3/TMEM100	14
BP	GO:0072376	protein activation cascade	10/228	182/17653	0.000130929	0.00401244	0.00314789	A2M/C4BPA/C7/CFB/CPB2/FCN3/PROS1/RGCC/VSIG4/VWF	10
BP	GO:0032674	regulation of interleukin-5 production	4/228	21/17653	0.000136482	0.00414595	0.00325264	IL1RL1/IL33/SCGB1A1/TNFRSF21	4
BP	GO:0007568	aging	13/228	298/17653	0.000139516	0.00416741	0.00326947	AGER/CAT/COL3A1/CRYAB/EDN1/EDNRB/FOS/MME/NQO1/TBX3/TGFBR2/TIMP1/TYMS	13
BP	GO:0001667	ameboidal-type cell migration	16/228	426/17653	0.000139596	0.00416741	0.00326947	ANGPT1/ANXA3/EDN1/EDNRB/HBEGF/KLF4/MMP9/RGCC/S100P/SASH1/SEMA5A/SLIT2/STARD13/TEK/TGFBR2/TIMP1	16
BP	GO:0051271	negative regulation of cellular component movement	14/228	340/17653	0.000142277	0.00421117	0.0033038	ADARB1/COL3A1/CX3CR1/DACH1/IL33/KLF4/RGCC/RRAS/SEMA5A/SLIT2/STARD13/SULF1/TGFBR3/TIMP1	14
BP	GO:0098754	detoxification	8/228	119/17653	0.000156989	0.00460723	0.00361453	CAT/CD36/DUOX1/FBLN5/HBB/MT1M/NQO1/SESN1	8
BP	GO:0007565	female pregnancy	10/228	187/17653	0.000163469	0.00475709	0.0037321	CLIC5/FOS/FOSB/MMP9/RAMP2/SCGB1A1/SLC2A1/SPP1/TGFBR2/TIMP1	10
BP	GO:0032634	interleukin-5 production	4/228	22/17653	0.000165129	0.00476535	0.00373858	IL1RL1/IL33/SCGB1A1/TNFRSF21	4
BP	GO:0010634	positive regulation of epithelial cell migration	9/228	154/17653	0.000178786	0.00511682	0.00401432	ANGPT1/ANXA3/EDN1/HBEGF/MMP9/SASH1/SEMA5A/TEK/TGFBR2	9
BP	GO:0007585	respiratory gaseous exchange	6/228	65/17653	0.000190091	0.00535192	0.00419876	DACH1/EDN1/HOXA5/SFTPC/SFTPD/TNNC1	6
BP	GO:0042116	macrophage activation	6/228	65/17653	0.000190091	0.00535192	0.00419876	AGER/CD93/CX3CR1/IL1RL1/IL33/LDLR	6
BP	GO:0071248	cellular response to metal ion	9/228	156/17653	0.000197004	0.00546534	0.00428774	ECT2/EDN1/FABP4/FOS/FOSB/MMP9/MT1M/NQO1/TFAP2A	9
BP	GO:0003158	endothelium development	8/228	123/17653	0.000197276	0.00546534	0.00428774	CD34/CDH5/HEG1/HEY1/PECAM1/S1PR1/STARD13/TMEM100	8
BP	GO:0031623	receptor internalization	7/228	93/17653	0.00020198	0.00555125	0.00435515	ANGPT1/ARRB1/CALCRL/CAV1/CD36/RAMP2/RAMP3	7
BP	GO:0097237	cellular response to toxic substance	11/228	231/17653	0.000214779	0.00585653	0.00459464	ADIRF/CAT/CD36/DUOX1/ECT2/FBLN5/HBB/IL6/KLF4/NQO1/SESN1	11
BP	GO:0003281	ventricular septum development	6/228	67/17653	0.000224798	0.00608183	0.0047714	HEG1/HEY1/SMAD6/TBX3/TGFBR2/TGFBR3	6
BP	GO:0006956	complement activation	9/228	159/17653	0.000227211	0.00609947	0.00478525	A2M/C4BPA/C7/CFB/CPB2/FCN3/PROS1/RGCC/VSIG4	9
BP	GO:2001214	positive regulation of vasculogenesis	3/228	10/17653	0.000238625	0.0063566	0.00498697	CD34/RAMP2/TMEM100	3
BP	GO:0055008	cardiac muscle tissue morphogenesis	6/228	68/17653	0.000243925	0.00644819	0.00505882	COL11A1/DSP/HEG1/S1PR1/TGFBR3/TNNC1	6
BP	GO:0002576	platelet degranulation	8/228	128/17653	0.000259204	0.00677665	0.00531652	A2M/CD36/PECAM1/PHACTR2/PROS1/TIMP1/TIMP3/VWF	8
BP	GO:0051591	response to cAMP	7/228	97/17653	0.000262221	0.00677665	0.00531652	CDO1/COL1A1/DUOX1/DUSP1/FOS/FOSB/TEK	7
BP	GO:0098869	cellular oxidant detoxification	7/228	97/17653	0.000262221	0.00677665	0.00531652	CAT/CD36/DUOX1/FBLN5/HBB/NQO1/SESN1	7
BP	GO:0032570	response to progesterone	5/228	45/17653	0.000275866	0.00702022	0.0055076	CAV1/FOS/FOSB/RAMP2/TYMS	5
BP	GO:0001774	microglial cell activation	4/228	25/17653	0.000277014	0.00702022	0.0055076	AGER/CX3CR1/IL33/LDLR	4
BP	GO:0050714	positive regulation of protein secretion	11/228	238/17653	0.000277727	0.00702022	0.0055076	ARRB1/CD34/IL1RL1/IL33/IL6/LPL/MMP12/MYH10/PLA2G1B/RGCC/SPTBN1	11
BP	GO:0003018	vascular process in circulatory system	9/228	164/17653	0.000286066	0.00717859	0.00563185	ANGPT1/CAV1/EDN1/EDNRB/HBB/RAMP2/SLC6A4/SLIT2/TEK	9
BP	GO:0048638	regulation of developmental growth	13/228	323/17653	0.000306003	0.00762365	0.00598101	AGR2/CACNA2D2/CRABP2/DPYSL2/EDN1/GHR/NEDD4L/SEMA5A/SLC6A4/SOCS2/SPP1/TGFBR2/TGFBR3	13
BP	GO:0042482	positive regulation of odontogenesis	3/228	11/17653	0.000324986	0.00798174	0.00626195	CD34/EDN1/TFAP2A	3
BP	GO:0060433	bronchus development	3/228	11/17653	0.000324986	0.00798174	0.00626195	AGR2/HOXA5/TGFBR2	3
BP	GO:0051051	negative regulation of transport	16/228	460/17653	0.000330943	0.0080708	0.00633182	ANGPT1/CAV1/CD34/CRYAB/EDN1/GPM6B/IL33/LRRC32/MMP9/NEDD4L/PID1/RAB11FIP1/RGCC/SPINK1/STXBP6/TNFRSF21	16
BP	GO:1990748	cellular detoxification	7/228	101/17653	0.000336141	0.00808535	0.00634324	CAT/CD36/DUOX1/FBLN5/HBB/NQO1/SESN1	7
BP	GO:0048565	digestive tract development	8/228	133/17653	0.000336209	0.00808535	0.00634324	AGR2/CLDN18/COL3A1/EDNRB/HOXA5/TCF21/TGFBR2/TYMS	8
BP	GO:0045926	negative regulation of growth	11/228	244/17653	0.000343453	0.00816582	0.00640636	CD36/CRYAB/FHL1/GPC3/MT1M/SEMA5A/SLC6A4/SLIT2/SOCS2/SPP1/TGFBR2	11
BP	GO:0032496	response to lipopolysaccharide	13/228	327/17653	0.000344271	0.00816582	0.00640636	CD36/CX3CR1/CXCL2/EDN1/EDNRB/FOS/IL6/PLSCR4/SASH1/SCGB1A1/SLPI/TNFRSF21/ZFP36	13
BP	GO:0001823	mesonephros development	7/228	102/17653	0.000357008	0.00824241	0.00646645	CAT/EPCAM/GPC3/SLIT2/SMAD6/TCF21/ZBTB16	7
BP	GO:0002040	sprouting angiogenesis	9/228	169/17653	0.00035702	0.00824241	0.00646645	ANGPT1/CDH5/KLF4/RAMP2/SEMA5A/SEMA6A/SLIT2/STARD13/TEK	9
BP	GO:0016525	negative regulation of angiogenesis	9/228	169/17653	0.00035702	0.00824241	0.00646645	CX3CR1/HOXA5/KLF4/RGCC/SEMA6A/STARD13/SULF1/TEK/THBS2	9
BP	GO:0048771	tissue remodeling	9/228	169/17653	0.00035702	0.00824241	0.00646645	AGER/CA2/CAV1/CLDN18/EPAS1/IL6/PDK4/S1PR1/SPP1	9
BP	GO:0055010	ventricular cardiac muscle tissue morphogenesis	5/228	48/17653	0.000374676	0.00859273	0.00674129	COL11A1/DSP/HEG1/TGFBR3/TNNC1	5
BP	GO:0032642	regulation of chemokine production	6/228	74/17653	0.000387163	0.00876304	0.0068749	AGER/IL1RL1/IL33/IL6/KLF4/LPL	6
BP	GO:0043627	response to estrogen	6/228	74/17653	0.000387163	0.00876304	0.0068749	CA2/CAV1/CD24/SMAD6/TEK/TGFBR2	6
BP	GO:0043112	receptor metabolic process	9/228	172/17653	0.000406159	0.00902735	0.00708227	ANGPT1/ARRB1/CALCRL/CAV1/CD36/EDN1/HOXA5/RAMP2/RAMP3	9
BP	GO:2000181	negative regulation of blood vessel morphogenesis	9/228	172/17653	0.000406159	0.00902735	0.00708227	CX3CR1/HOXA5/KLF4/RGCC/SEMA6A/STARD13/SULF1/TEK/THBS2	9
BP	GO:0043542	endothelial cell migration	11/228	249/17653	0.000407795	0.00902735	0.00708227	ANGPT1/ANXA3/EDN1/KLF4/RGCC/S100P/SASH1/SEMA5A/SLIT2/STARD13/TEK	11
BP	GO:0072006	nephron development	8/228	137/17653	0.000410431	0.00902735	0.00708227	ANGPT1/CD24/CD34/GPC3/PECAM1/SULF1/TCF21/TEK	8
BP	GO:0010594	regulation of endothelial cell migration	10/228	210/17653	0.000414481	0.00902735	0.00708227	ANGPT1/ANXA3/EDN1/KLF4/RGCC/SASH1/SEMA5A/SLIT2/STARD13/TEK	10
BP	GO:0045444	fat cell differentiation	10/228	210/17653	0.000414481	0.00902735	0.00708227	ADIRF/FABP4/GRK5/IL6/KLF4/MMP11/SMAD6/WIF1/ZBTB16/ZFP36	10
BP	GO:0043116	negative regulation of vascular permeability	3/228	12/17653	0.000429191	0.00919781	0.007216	ANGPT1/RAMP2/SLIT2	3
BP	GO:0090197	positive regulation of chemokine secretion	3/228	12/17653	0.000429191	0.00919781	0.007216	IL1RL1/IL33/LPL	3
BP	GO:0033002	muscle cell proliferation	10/228	211/17653	0.000430276	0.00919781	0.007216	ANGPT1/CALCRL/EDN1/HBEGF/IL6/KLF4/MMP9/S1PR1/TGFBR2/TGFBR3	10
BP	GO:0007159	leukocyte cell-cell adhesion	13/228	335/17653	0.000433162	0.00920271	0.00721984	AGER/CAV1/CD24/IL6/IL7R/KLF4/LRRC32/PECAM1/SCGB1A1/SFTPD/TGFBR2/TNFRSF21/ZBTB16	13
BP	GO:0007566	embryo implantation	5/228	50/17653	0.000454016	0.00958693	0.00752128	MMP9/SCGB1A1/SPP1/TGFBR2/TIMP1	5
BP	GO:0030336	negative regulation of cell migration	12/228	296/17653	0.000487181	0.0102249	0.00802178	ADARB1/COL3A1/CX3CR1/DACH1/IL33/KLF4/RGCC/RRAS/SLIT2/STARD13/SULF1/TIMP1	12
BP	GO:0050777	negative regulation of immune response	8/228	141/17653	0.000497461	0.0103143	0.0080919	A2M/ANGPT1/C4BPA/COL3A1/IL1RL1/IL33/IL7R/MMP12	8
BP	GO:0042036	negative regulation of cytokine biosynthetic process	4/228	29/17653	0.000499484	0.0103143	0.0080919	IL6/KLF4/SFTPD/ZFP36	4
BP	GO:0097529	myeloid leukocyte migration	9/228	177/17653	0.000500375	0.0103143	0.0080919	CX3CR1/CXCL2/EDN1/EDNRB/IL6/PECAM1/PLA2G1B/SFTPD/SLIT2	9
BP	GO:0030193	regulation of blood coagulation	6/228	78/17653	0.000514328	0.0104772	0.0082197	CAV1/CD34/CD36/CPB2/EDN1/PROS1	6
BP	GO:1900046	regulation of hemostasis	6/228	78/17653	0.000514328	0.0104772	0.0082197	CAV1/CD34/CD36/CPB2/EDN1/PROS1	6
BP	GO:0048639	positive regulation of developmental growth	9/228	178/17653	0.000521217	0.0105554	0.00828108	AGR2/CACNA2D2/CRABP2/EDN1/GHR/NEDD4L/SEMA5A/TGFBR2/TGFBR3	9
BP	GO:1901343	negative regulation of vasculature development	9/228	179/17653	0.000542767	0.0108651	0.00852403	CX3CR1/HOXA5/KLF4/RGCC/SEMA6A/STARD13/SULF1/TEK/THBS2	9
BP	GO:0022407	regulation of cell-cell adhesion	14/228	388/17653	0.000542784	0.0108651	0.00852403	AGER/CAV1/CD24/EPCAM/IL6/IL7R/KLF4/LRRC32/RGCC/SCGB1A1/SFTPD/TGFBR2/TNFRSF21/ZBTB16	14
BP	GO:0048660	regulation of smooth muscle cell proliferation	8/228	143/17653	0.00054627	0.010872	0.00852948	CALCRL/EDN1/HBEGF/IL6/KLF4/MMP9/S1PR1/TGFBR2	8
BP	GO:0001933	negative regulation of protein phosphorylation	15/228	435/17653	0.000554437	0.0109715	0.00860753	ADARB1/ANGPT1/ARRB1/CAV1/DUSP1/FABP4/FLRT3/GPRC5A/KLF4/PID1/SLIT2/SMAD6/SOCS2/SPINK1/TIMP3	15
BP	GO:0071241	cellular response to inorganic substance	9/228	180/17653	0.000565042	0.0110957	0.00870494	ECT2/EDN1/FABP4/FOS/FOSB/MMP9/MT1M/NQO1/TFAP2A	9
BP	GO:0002793	positive regulation of peptide secretion	11/228	259/17653	0.00056712	0.0110957	0.00870494	ARRB1/CD34/IL1RL1/IL33/IL6/LPL/MMP12/MYH10/PLA2G1B/RGCC/SPTBN1	11
BP	GO:1903037	regulation of leukocyte cell-cell adhesion	12/228	302/17653	0.000582002	0.0112658	0.00883842	AGER/CAV1/CD24/IL6/IL7R/KLF4/LRRC32/SCGB1A1/SFTPD/TGFBR2/TNFRSF21/ZBTB16	12
BP	GO:0043900	regulation of multi-organism process	14/228	391/17653	0.000585476	0.0112658	0.00883842	ADARB1/CAV1/CD36/EDNRB/FCN3/LAMP3/MMP12/SASH1/SFTPD/SLPI/SPINK1/TIMP1/TOP2A/ZFP36	14
BP	GO:0045927	positive regulation of growth	11/228	260/17653	0.000585575	0.0112658	0.00883842	AGR2/CACNA2D2/CRABP2/EDN1/GHR/HBEGF/NEDD4L/SEMA5A/TGFBR2/TGFBR3/WFS1	11
BP	GO:0043312	neutrophil degranulation	16/228	485/17653	0.000588914	0.0112674	0.0088397	ANXA3/CAT/CD36/CD93/DSP/HBB/LCN2/METTL7A/MME/MMP9/OLR1/PECAM1/PTPRB/S100P/SLPI/TCN1	16
BP	GO:0055123	digestive system development	8/228	145/17653	0.000598885	0.0113953	0.00893998	AGR2/CLDN18/COL3A1/EDNRB/HOXA5/TCF21/TGFBR2/TYMS	8
BP	GO:0007179	transforming growth factor beta receptor signaling pathway	9/228	182/17653	0.000611842	0.0115782	0.00908349	CAV1/CDH5/COL3A1/FERMT2/FOS/GDF15/SMAD6/TGFBR2/TGFBR3	9
BP	GO:0048659	smooth muscle cell proliferation	8/228	146/17653	0.000626687	0.0117178	0.009193	CALCRL/EDN1/HBEGF/IL6/KLF4/MMP9/S1PR1/TGFBR2	8
BP	GO:0002283	neutrophil activation involved in immune response	16/228	488/17653	0.000629174	0.0117178	0.009193	ANXA3/CAT/CD36/CD93/DSP/HBB/LCN2/METTL7A/MME/MMP9/OLR1/PECAM1/PTPRB/S100P/SLPI/TCN1	16
BP	GO:0032602	chemokine production	6/228	81/17653	0.00062937	0.0117178	0.009193	AGER/IL1RL1/IL33/IL6/KLF4/LPL	6
BP	GO:1903531	negative regulation of secretion by cell	9/228	183/17653	0.000636405	0.0117854	0.00924605	ANGPT1/CD34/EDN1/IL33/LRRC32/RAB11FIP1/RGCC/STXBP6/TNFRSF21	9
BP	GO:0061900	glial cell activation	4/228	31/17653	0.000648474	0.011945	0.00937129	AGER/CX3CR1/IL33/LDLR	4
BP	GO:0014074	response to purine-containing compound	8/228	147/17653	0.000655523	0.012011	0.00942303	CDO1/COL1A1/DUOX1/DUSP1/FOS/FOSB/SLC6A4/TEK	8
BP	GO:0003014	renal system process	7/228	113/17653	0.000662565	0.0120203	0.00943034	AQP4/CD34/EDN1/EDNRB/HBB/SULF1/WFS1	7
BP	GO:0060537	muscle tissue development	14/228	396/17653	0.000662973	0.0120203	0.00943034	CAV1/CENPF/COL11A1/COL3A1/DSP/EDN1/FOS/HEG1/S1PR1/TBX3/TCF21/TGFBR2/TGFBR3/TNNC1	14
BP	GO:0046849	bone remodeling	6/228	82/17653	0.000671843	0.0121177	0.00950673	CA2/CLDN18/IL6/PDK4/S1PR1/SPP1	6
BP	GO:0006957	complement activation, alternative pathway	3/228	14/17653	0.00069668	0.0124361	0.00975654	C7/CFB/VSIG4	3
BP	GO:0090196	regulation of chemokine secretion	3/228	14/17653	0.00069668	0.0124361	0.00975654	IL1RL1/IL33/LPL	3
BP	GO:0040013	negative regulation of locomotion	13/228	353/17653	0.000706591	0.0125003	0.00980689	ADARB1/COL3A1/CX3CR1/DACH1/IL33/KLF4/RGCC/RRAS/SEMA5A/SLIT2/STARD13/SULF1/TIMP1	13
BP	GO:0032722	positive regulation of chemokine production	5/228	55/17653	0.000707494	0.0125003	0.00980689	AGER/IL1RL1/IL33/IL6/LPL	5
BP	GO:0002673	regulation of acute inflammatory response	8/228	149/17653	0.000716406	0.0125299	0.00983011	A2M/C4BPA/C7/CFB/CPB2/EDNRB/IL6/PROS1	8
BP	GO:0042129	regulation of T cell proliferation	8/228	149/17653	0.000716406	0.0125299	0.00983011	AGER/CD24/IL6/LRRC32/SCGB1A1/SFTPD/TGFBR2/TNFRSF21	8
BP	GO:0032102	negative regulation of response to external stimulus	12/228	310/17653	0.000732171	0.0127035	0.0099663	AGER/CALCRL/CD34/CDH5/CPB2/EDN1/KLF4/PROS1/SEMA5A/SLIT2/SPP1/TEK	12
BP	GO:0060317	cardiac epithelial to mesenchymal transition	4/228	32/17653	0.000733668	0.0127035	0.0099663	HEY1/TGFBR2/TGFBR3/TMEM100	4
BP	GO:2000146	negative regulation of cell motility	12/228	311/17653	0.00075304	0.012974	0.0101786	ADARB1/COL3A1/CX3CR1/DACH1/IL33/KLF4/RGCC/RRAS/SLIT2/STARD13/SULF1/TIMP1	12
BP	GO:0050818	regulation of coagulation	6/228	84/17653	0.000763425	0.0130234	0.0102173	CAV1/CD34/CD36/CPB2/EDN1/PROS1	6
BP	GO:1903426	regulation of reactive oxygen species biosynthetic process	6/228	84/17653	0.000763425	0.0130234	0.0102173	CAV1/CD34/CD36/EDN1/HBB/KLF4	6
BP	GO:0050715	positive regulation of cytokine secretion	7/228	116/17653	0.000774329	0.0131446	0.0103124	CD34/IL1RL1/IL33/LPL/MMP12/RGCC/SPTBN1	7
BP	GO:0042119	neutrophil activation	16/228	498/17653	0.000780859	0.0131786	0.010339	ANXA3/CAT/CD36/CD93/DSP/HBB/LCN2/METTL7A/MME/MMP9/OLR1/PECAM1/PTPRB/S100P/SLPI/TCN1	16
BP	GO:0050678	regulation of epithelial cell proliferation	13/228	357/17653	0.000783941	0.0131786	0.010339	CAV1/CDH3/CPB2/EDNRB/GPC3/HOXA5/MMP12/RGCC/SEMA5A/SULF1/TEK/TGFBR3/ZFP36	13
BP	GO:1903035	negative regulation of response to wounding	6/228	85/17653	0.000812687	0.0135958	0.0106664	AGER/CD34/CPB2/EDN1/PROS1/SPP1	6
BP	GO:0043114	regulation of vascular permeability	4/228	33/17653	0.000826481	0.0137601	0.0107953	ANGPT1/RAMP2/SLIT2/TEK	4
BP	GO:0060761	negative regulation of response to cytokine stimulus	5/228	57/17653	0.000833961	0.0138182	0.0108409	CAV1/IL6/KLF4/MMP12/SLIT2	5
BP	GO:1990000	amyloid fibril formation	3/228	15/17653	0.000862579	0.0142243	0.0111595	CD36/CRYAB/LDLR	3
BP	GO:0060326	cell chemotaxis	11/228	273/17653	0.000874844	0.0143582	0.0112645	CX3CR1/CXCL2/EDN1/EDNRB/HBEGF/IL6/PLA2G1B/S1PR1/SEMA5A/SFTPD/SLIT2	11
BP	GO:0050673	epithelial cell proliferation	14/228	409/17653	0.000906271	0.0148039	0.0116141	CAV1/CD34/CDH3/CPB2/EDNRB/GPC3/HOXA5/MMP12/RGCC/SEMA5A/SULF1/TEK/TGFBR3/ZFP36	14
BP	GO:0050709	negative regulation of protein secretion	7/228	120/17653	0.00094598	0.01538	0.0120661	ANGPT1/CD34/IL33/LRRC32/RAB11FIP1/RGCC/TNFRSF21	7
BP	GO:0050710	negative regulation of cytokine secretion	5/228	59/17653	0.00097655	0.0158028	0.0123978	ANGPT1/CD34/LRRC32/RGCC/TNFRSF21	5
BP	GO:0052548	regulation of endopeptidase activity	14/228	414/17653	0.00101805	0.0163978	0.0128646	A2M/ANOS1/ARRB1/CRYAB/CST1/KLF4/LAMP3/MMP9/PROS1/SLPI/SPINK1/SPOCK2/TIMP1/TIMP3	14
BP	GO:0002823	negative regulation of adaptive immune response based on somatic recombination of immune receptors built from immunoglobulin superfamily domains	4/228	35/17653	0.00103642	0.0164639	0.0129165	C4BPA/IL1RL1/IL33/IL7R	4
BP	GO:0044331	cell-cell adhesion mediated by cadherin	4/228	35/17653	0.00103642	0.0164639	0.0129165	CDH3/CDH5/EPCAM/RGCC	4
BP	GO:2000648	positive regulation of stem cell proliferation	4/228	35/17653	0.00103642	0.0164639	0.0129165	ASPM/CX3CR1/EPCAM/TBX3	4
BP	GO:0090195	chemokine secretion	3/228	16/17653	0.00105156	0.0165525	0.012986	IL1RL1/IL33/LPL	3
BP	GO:2000811	negative regulation of anoikis	3/228	16/17653	0.00105156	0.0165525	0.012986	CAV1/CEACAM5/PDK4	3
BP	GO:0045216	cell-cell junction organization	10/228	238/17653	0.00108861	0.0170582	0.0133827	CAV1/CDH3/CDH5/DSP/ECT2/FERMT2/GPM6B/HEG1/RAMP2/TEK	10
BP	GO:0001503	ossification	13/228	371/17653	0.00111313	0.0173639	0.0136226	CAT/COL11A1/COL1A1/GPC3/GPM6B/IL6/MMP9/S1PR1/SMAD6/SPP1/TEK/TFAP2A/ZBTB16	13
BP	GO:0071229	cellular response to acid chemical	9/228	200/17653	0.00119339	0.0185324	0.0145393	COL1A1/COL3A1/EDN1/KLF4/LDLR/PDK4/PID1/SESN1/SLC6A4	9
BP	GO:2000379	positive regulation of reactive oxygen species metabolic process	6/228	92/17653	0.00122972	0.0189649	0.0148786	CD36/EDN1/HBB/KLF4/PID1/TGFBR2	6
BP	GO:0034614	cellular response to reactive oxygen species	8/228	162/17653	0.0012322	0.0189649	0.0148786	CD36/ECT2/FBLN5/FOS/IL6/KLF4/MMP9/NQO1	8
BP	GO:0002792	negative regulation of peptide secretion	7/228	126/17653	0.00125818	0.0192791	0.0151251	ANGPT1/CD34/IL33/LRRC32/RAB11FIP1/RGCC/TNFRSF21	7
BP	GO:0034599	cellular response to oxidative stress	11/228	286/17653	0.00127374	0.0192977	0.0151397	CAT/CD36/ECT2/EPAS1/FBLN5/FOS/IL6/KLF4/MELK/MMP9/NQO1	11
BP	GO:0030595	leukocyte chemotaxis	9/228	202/17653	0.00127902	0.0192977	0.0151397	CX3CR1/CXCL2/EDN1/EDNRB/IL6/PLA2G1B/S1PR1/SFTPD/SLIT2	9
BP	GO:0048762	mesenchymal cell differentiation	9/228	202/17653	0.00127902	0.0192977	0.0151397	COL1A1/EDN1/EDNRB/HEY1/RGCC/TCF21/TGFBR2/TGFBR3/TMEM100	9
BP	GO:0021543	pallium development	8/228	163/17653	0.00128168	0.0192977	0.0151397	ANXA3/ASPM/COL3A1/CX3CR1/FEZ1/SLC2A1/SLIT2/TACC1	8
BP	GO:0042326	negative regulation of phosphorylation	15/228	473/17653	0.00129102	0.0193541	0.0151839	ADARB1/ANGPT1/ARRB1/CAV1/DUSP1/FABP4/FLRT3/GPRC5A/KLF4/PID1/SLIT2/SMAD6/SOCS2/SPINK1/TIMP3	15
BP	GO:0014706	striated muscle tissue development	13/228	379/17653	0.00134836	0.0201265	0.01579	CAV1/CENPF/COL11A1/DSP/EDN1/FOS/HEG1/S1PR1/TBX3/TCF21/TGFBR2/TGFBR3/TNNC1	13
BP	GO:0022617	extracellular matrix disassembly	6/228	94/17653	0.00137455	0.0204295	0.0160277	A2M/MMP11/MMP12/MMP9/SPP1/TIMP1	6
BP	GO:0016049	cell growth	15/228	477/17653	0.0014026	0.0207573	0.0162848	CRABP2/CRYAB/DPYSL2/EDN1/FAM107A/FBLN5/FHL1/FLRT3/HBEGF/NEDD4L/SEMA5A/SLIT2/SOCS2/SPP1/TGFBR2	15
BP	GO:0002820	negative regulation of adaptive immune response	4/228	38/17653	0.0014176	0.02089	0.0163889	C4BPA/IL1RL1/IL33/IL7R	4
BP	GO:0034332	adherens junction organization	7/228	129/17653	0.00144186	0.0211575	0.0165988	CDH3/CDH5/DSP/FERMT2/GPM6B/RAMP2/TEK	7
BP	GO:0030324	lung development	8/228	167/17653	0.00149569	0.0218548	0.0171458	AGR2/EPAS1/GPC3/HEG1/HOXA5/SFTPD/TCF21/TGFBR2	8
BP	GO:0050921	positive regulation of chemotaxis	7/228	130/17653	0.00150752	0.0219351	0.0172088	AGER/CXCL2/EDN1/IL6/S1PR1/SEMA5A/SLIT2	7
BP	GO:0051048	negative regulation of secretion	9/228	208/17653	0.00156607	0.0226916	0.0178023	ANGPT1/CD34/EDN1/IL33/LRRC32/RAB11FIP1/RGCC/STXBP6/TNFRSF21	9
BP	GO:0045807	positive regulation of endocytosis	7/228	131/17653	0.0015755	0.0227331	0.0178349	ANGPT1/ARRB1/CD36/GPC3/LDLR/NEDD4L/SFTPD	7
BP	GO:0001657	ureteric bud development	6/228	97/17653	0.00161579	0.0231912	0.0181943	CAT/EPCAM/GPC3/SLIT2/SMAD6/TCF21	6
BP	GO:0006801	superoxide metabolic process	5/228	66/17653	0.00162064	0.0231912	0.0181943	CD36/DUOX1/EDN1/FBLN5/NQO1	5
BP	GO:0072163	mesonephric epithelium development	6/228	98/17653	0.00170295	0.0241693	0.0189616	CAT/EPCAM/GPC3/SLIT2/SMAD6/TCF21	6
BP	GO:0072164	mesonephric tubule development	6/228	98/17653	0.00170295	0.0241693	0.0189616	CAT/EPCAM/GPC3/SLIT2/SMAD6/TCF21	6
BP	GO:0043030	regulation of macrophage activation	4/228	40/17653	0.00172015	0.024215	0.0189975	AGER/IL1RL1/IL33/LDLR	4
BP	GO:0060412	ventricular septum morphogenesis	4/228	40/17653	0.00172015	0.024215	0.0189975	HEY1/TBX3/TGFBR2/TGFBR3	4
BP	GO:0048588	developmental cell growth	9/228	211/17653	0.00172784	0.0242247	0.0190051	CRABP2/DPYSL2/EDN1/FLRT3/NEDD4L/SEMA5A/SLIT2/SPP1/TGFBR2	9
BP	GO:0030323	respiratory tube development	8/228	171/17653	0.00173713	0.0242568	0.0190303	AGR2/EPAS1/GPC3/HEG1/HOXA5/SFTPD/TCF21/TGFBR2	8
BP	GO:0032703	negative regulation of interleukin-2 production	3/228	19/17653	0.00176832	0.0243971	0.0191404	CD34/SFTPD/ZFP36	3
BP	GO:0034104	negative regulation of tissue remodeling	3/228	19/17653	0.00176832	0.0243971	0.0191404	AGER/CLDN18/IL6	3
BP	GO:0097242	amyloid-beta clearance	3/228	19/17653	0.00176832	0.0243971	0.0191404	LDLR/MARCO/MME	3
BP	GO:0035265	organ growth	8/228	172/17653	0.00180206	0.024764	0.0194282	CACNA2D2/COMP/EDN1/HEG1/S1PR1/SLC6A4/TGFBR2/TGFBR3	8
BP	GO:0045785	positive regulation of cell adhesion	13/228	392/17653	0.0018182	0.024887	0.0195247	AGER/AGR2/ANGPT1/CAV1/CD24/CD36/IL6/IL7R/NDNF/SPOCK2/TEK/TGFBR2/ZBTB16	13
BP	GO:0035136	forelimb morphogenesis	4/228	41/17653	0.00188704	0.0256389	0.0201146	CRABP2/TBX3/TFAP2A/ZBTB16	4
BP	GO:0003279	cardiac septum development	6/228	100/17653	0.00188793	0.0256389	0.0201146	HEG1/HEY1/SMAD6/TBX3/TGFBR2/TGFBR3	6
BP	GO:0030099	myeloid cell differentiation	13/228	394/17653	0.00190125	0.0257189	0.0201774	CA2/CLDN18/EPAS1/FOS/GPC3/HMGB3/HOXA5/MMP9/MYL9/TGFBR2/TGFBR3/ZBTB16/ZFP36	13
BP	GO:0060485	mesenchyme development	10/228	257/17653	0.00192723	0.0259689	0.0203735	COL1A1/EDN1/EDNRB/HEY1/HOXA5/RGCC/TCF21/TGFBR2/TGFBR3/TMEM100	10
BP	GO:0042098	T cell proliferation	8/228	174/17653	0.00193765	0.0260081	0.0204042	AGER/CD24/IL6/LRRC32/SCGB1A1/SFTPD/TGFBR2/TNFRSF21	8
BP	GO:0060411	cardiac septum morphogenesis	5/228	69/17653	0.0019754	0.0264124	0.0207214	HEY1/SMAD6/TBX3/TGFBR2/TGFBR3	5
BP	GO:0001558	regulation of cell growth	13/228	397/17653	0.0020317	0.0270607	0.02123	CRABP2/CRYAB/DPYSL2/EDN1/FAM107A/FBLN5/FHL1/HBEGF/NEDD4L/SEMA5A/SLIT2/SOCS2/SPP1	13
BP	GO:0071404	cellular response to low-density lipoprotein particle stimulus	3/228	20/17653	0.00206068	0.0271879	0.0213299	CD36/LDLR/LPL	3
BP	GO:0045429	positive regulation of nitric oxide biosynthetic process	4/228	42/17653	0.00206481	0.0271879	0.0213299	CD36/EDN1/HBB/KLF4	4
BP	GO:1904407	positive regulation of nitric oxide metabolic process	4/228	42/17653	0.00206481	0.0271879	0.0213299	CD36/EDN1/HBB/KLF4	4
BP	GO:0030879	mammary gland development	7/228	138/17653	0.00212066	0.0278176	0.0218239	CAV1/CDO1/HOXA5/SOCS2/SOSTDC1/TBX3/TGFBR2	7
BP	GO:0060560	developmental growth involved in morphogenesis	9/228	218/17653	0.00215767	0.0281963	0.0221209	CRABP2/DPYSL2/FLRT3/NEDD4L/S1PR1/SEMA5A/SLIT2/SPP1/TGFBR2	9
BP	GO:1901653	cellular response to peptide	12/228	353/17653	0.00220484	0.0287044	0.0225196	AGER/CA2/CAV1/CD36/EDN1/GHR/GNG11/KLF4/PDK4/PID1/PLA2G1B/SOCS2	12
BP	GO:0031644	regulation of neurological system process	5/228	71/17653	0.00224143	0.0290714	0.0228075	EDN1/EDNRB/TMEM100/TNFRSF21/WASF3	5
BP	GO:2000241	regulation of reproductive process	7/228	140/17653	0.00230044	0.0297255	0.0233206	ASPM/CDC20/DUSP1/EDNRB/SPINK1/SULF1/TIMP1	7
BP	GO:0048738	cardiac muscle tissue development	9/228	221/17653	0.00236617	0.0301282	0.0236366	COL11A1/DSP/EDN1/HEG1/S1PR1/TBX3/TGFBR2/TGFBR3/TNNC1	9
BP	GO:0003181	atrioventricular valve morphogenesis	3/228	21/17653	0.00238138	0.0301282	0.0236366	HEY1/SMAD6/TGFBR2	3
BP	GO:0032656	regulation of interleukin-13 production	3/228	21/17653	0.00238138	0.0301282	0.0236366	IL33/SCGB1A1/TNFRSF21	3
BP	GO:0042632	cholesterol homeostasis	5/228	72/17653	0.00238381	0.0301282	0.0236366	CAV1/CD24/FABP4/LDLR/LPL	5
BP	GO:0055092	sterol homeostasis	5/228	72/17653	0.00238381	0.0301282	0.0236366	CAV1/CD24/FABP4/LDLR/LPL	5
BP	GO:0061045	negative regulation of wound healing	5/228	72/17653	0.00238381	0.0301282	0.0236366	AGER/CD34/CPB2/EDN1/PROS1	5
BP	GO:0060759	regulation of response to cytokine stimulus	8/228	180/17653	0.00239326	0.0301377	0.023644	ANGPT1/CAV1/CD24/EDN1/IL6/KLF4/MMP12/SLIT2	8
BP	GO:0002697	regulation of immune effector process	13/228	405/17653	0.0024161	0.030315	0.0237832	A2M/AGER/ANGPT1/C4BPA/C7/CD36/CFB/CPB2/IL33/IL6/IL7R/MMP12/PROS1	13
BP	GO:0043903	regulation of symbiosis, encompassing mutualism through parasitism	9/228	222/17653	0.00243912	0.0304934	0.0239232	ADARB1/CAV1/CD36/FCN3/LAMP3/SFTPD/SLPI/TOP2A/ZFP36	9
BP	GO:0070372	regulation of ERK1 and ERK2 cascade	11/228	311/17653	0.00246042	0.030649	0.0240452	AGER/ANGPT1/ARRB1/CD36/DUSP1/KLF4/MARCO/RAMP3/RRAS/TEK/TIMP3	11
BP	GO:0034329	cell junction assembly	9/228	223/17653	0.00251385	0.0312024	0.0244794	CAV1/CDH3/CDH5/ECT2/FERMT2/GPM6B/HEG1/RAMP2/TEK	9
BP	GO:0030449	regulation of complement activation	6/228	107/17653	0.00265708	0.0328624	0.0257817	A2M/C4BPA/C7/CFB/CPB2/PROS1	6
BP	GO:0072010	glomerular epithelium development	3/228	22/17653	0.00273131	0.0336602	0.0264076	CD24/CD34/PECAM1	3
BP	GO:0034330	cell junction organization	10/228	270/17653	0.00275632	0.0338479	0.0265549	CAV1/CDH3/CDH5/DSP/ECT2/FERMT2/GPM6B/HEG1/RAMP2/TEK	10
BP	GO:2000257	regulation of protein activation cascade	6/228	108/17653	0.00278368	0.0340631	0.0267237	A2M/C4BPA/C7/CFB/CPB2/PROS1	6
BP	GO:0061138	morphogenesis of a branching epithelium	8/228	185/17653	0.00283372	0.0345534	0.0271083	EDN1/GPC3/HOXA5/SLIT2/SULF1/TBX3/TCF21/TGFBR2	8
BP	GO:0019731	antibacterial humoral response	4/228	46/17653	0.00289179	0.0350149	0.0274704	DMBT1/PLA2G1B/SFTPD/SLPI	4
BP	GO:0060443	mammary gland morphogenesis	4/228	46/17653	0.00289179	0.0350149	0.0274704	CAV1/SOSTDC1/TBX3/TGFBR2	4
BP	GO:0021987	cerebral cortex development	6/228	109/17653	0.00291473	0.0351697	0.0275919	ASPM/COL3A1/CX3CR1/SLC2A1/SLIT2/TACC1	6
BP	GO:0030100	regulation of endocytosis	9/228	229/17653	0.00300125	0.0360879	0.0283122	ANGPT1/ARRB1/C4BPA/CAV1/CD36/GPC3/LDLR/NEDD4L/SFTPD	9
BP	GO:0060348	bone development	8/228	187/17653	0.00302664	0.0362674	0.028453	CLDN18/COL1A1/COMP/PAPSS2/SULF1/TEK/TFAP2A/TGFBR2	8
BP	GO:0031349	positive regulation of defense response	14/228	466/17653	0.00304066	0.0363097	0.0284862	CAV1/CD36/DMBT1/FABP4/ICAM2/IL1RL1/IL33/IL6/LDLR/LPL/MARCO/MMP12/MUC16/SFTPD	14
BP	GO:0032616	interleukin-13 production	3/228	23/17653	0.00311132	0.0365238	0.0286542	IL33/SCGB1A1/TNFRSF21	3
BP	GO:0042744	hydrogen peroxide catabolic process	3/228	23/17653	0.00311132	0.0365238	0.0286542	CAT/DUOX1/HBB	3
BP	GO:0043032	positive regulation of macrophage activation	3/228	23/17653	0.00311132	0.0365238	0.0286542	AGER/IL1RL1/IL33	3
BP	GO:0055093	response to hyperoxia	3/228	23/17653	0.00311132	0.0365238	0.0286542	CAT/CAV1/COL1A1	3
BP	GO:2000209	regulation of anoikis	3/228	23/17653	0.00311132	0.0365238	0.0286542	CAV1/CEACAM5/PDK4	3
BP	GO:0030199	collagen fibril organization	4/228	47/17653	0.00312924	0.0365511	0.0286756	COL11A1/COL1A1/COL3A1/MMP11	4
BP	GO:0050863	regulation of T cell activation	11/228	321/17653	0.00313476	0.0365511	0.0286756	AGER/CAV1/CD24/IL6/IL7R/LRRC32/SCGB1A1/SFTPD/TGFBR2/TNFRSF21/ZBTB16	11
BP	GO:0072089	stem cell proliferation	6/228	111/17653	0.00319063	0.0368924	0.0289434	ASPM/CD34/CX3CR1/EML1/EPCAM/TBX3	6
BP	GO:2000117	negative regulation of cysteine-type endopeptidase activity	6/228	111/17653	0.00319063	0.0368924	0.0289434	ARRB1/CRYAB/CST1/KLF4/LAMP3/MMP9	6
BP	GO:0031100	animal organ regeneration	5/228	77/17653	0.00319599	0.0368924	0.0289434	ANXA3/CPB2/TGFBR2/TGFBR3/TYMS	5
BP	GO:0003015	heart process	10/228	278/17653	0.00339431	0.0389222	0.0305358	CACNA2D2/CAV1/DES/DSP/EDN1/EPAS1/HBEGF/NEDD4L/RAMP3/TNNC1	10
BP	GO:0070661	leukocyte proliferation	10/228	278/17653	0.00339431	0.0389222	0.0305358	AGER/CD24/IL33/IL6/IL7R/LRRC32/SCGB1A1/SFTPD/TGFBR2/TNFRSF21	10
BP	GO:0097305	response to alcohol	8/228	191/17653	0.0034431	0.0393513	0.0308725	CAT/CDO1/CLDN18/KLF4/NQO1/TGFBR2/TGFBR3/TYMS	8
BP	GO:0003171	atrioventricular valve development	3/228	24/17653	0.00352222	0.0401232	0.031478	HEY1/SMAD6/TGFBR2	3
BP	GO:0090288	negative regulation of cellular response to growth factor stimulus	7/228	152/17653	0.00363855	0.0410643	0.0322163	CAV1/SLIT2/SMAD6/SOSTDC1/SULF1/TGFBR2/TGFBR3	7
BP	GO:0007043	cell-cell junction assembly	6/228	114/17653	0.00364041	0.0410643	0.0322163	CAV1/CDH3/CDH5/ECT2/HEG1/RAMP2	6
BP	GO:0010595	positive regulation of endothelial cell migration	6/228	114/17653	0.00364041	0.0410643	0.0322163	ANGPT1/ANXA3/EDN1/SASH1/SEMA5A/TEK	6
BP	GO:0060541	respiratory system development	8/228	193/17653	0.00366734	0.0412337	0.0323493	AGR2/EPAS1/GPC3/HEG1/HOXA5/SFTPD/TCF21/TGFBR2	8
BP	GO:0070371	ERK1 and ERK2 cascade	11/228	328/17653	0.00368977	0.0413517	0.0324418	AGER/ANGPT1/ARRB1/CD36/DUSP1/KLF4/MARCO/RAMP3/RRAS/TEK/TIMP3	11
BP	GO:0032970	regulation of actin filament-based process	12/228	377/17653	0.00375555	0.0417348	0.0327424	ARHGAP44/CAV1/DSP/EDN1/GPM6B/RGCC/S1PR1/SEMA5A/SLIT2/SPTBN1/TEK/TNNC1	12
BP	GO:0021537	telencephalon development	9/228	237/17653	0.00376401	0.0417348	0.0327424	ANXA3/ASPM/COL3A1/CRTAC1/CX3CR1/FEZ1/SLC2A1/SLIT2/TACC1	9
BP	GO:0050730	regulation of peptidyl-tyrosine phosphorylation	9/228	237/17653	0.00376401	0.0417348	0.0327424	ANGPT1/CAV1/CD24/CD36/GHR/GPRC5A/HBEGF/IL6/SPINK1	9
BP	GO:0048754	branching morphogenesis of an epithelial tube	7/228	153/17653	0.00377216	0.0417348	0.0327424	EDN1/GPC3/HOXA5/SLIT2/TBX3/TCF21/TGFBR2	7
BP	GO:0018108	peptidyl-tyrosine phosphorylation	12/228	379/17653	0.00391683	0.0426395	0.0334521	ANGPT1/CAV1/CD24/CD36/EFEMP1/GHR/GPRC5A/HBEGF/IL6/MELK/SPINK1/TEK	12
BP	GO:0032663	regulation of interleukin-2 production	4/228	50/17653	0.0039207	0.0426395	0.0334521	CD34/SFTPD/SPTBN1/ZFP36	4
BP	GO:0055078	sodium ion homeostasis	4/228	50/17653	0.0039207	0.0426395	0.0334521	C7/EDN1/EDNRB/NEDD4L	4
BP	GO:0060350	endochondral bone morphogenesis	4/228	50/17653	0.0039207	0.0426395	0.0334521	COL1A1/COMP/TEK/TGFBR2	4
BP	GO:0061971	replacement bone morphogenesis	4/228	50/17653	0.0039207	0.0426395	0.0334521	COL1A1/COMP/TEK/TGFBR2	4
BP	GO:0007263	nitric oxide mediated signal transduction	3/228	25/17653	0.00396475	0.0426395	0.0334521	CD36/NDNF/SPINK1	3
BP	GO:0019430	removal of superoxide radicals	3/228	25/17653	0.00396475	0.0426395	0.0334521	CD36/FBLN5/NQO1	3
BP	GO:0055094	response to lipoprotein particle	3/228	25/17653	0.00396475	0.0426395	0.0334521	CD36/LDLR/LPL	3
BP	GO:0060351	cartilage development involved in endochondral bone morphogenesis	3/228	25/17653	0.00396475	0.0426395	0.0334521	COL1A1/COMP/TGFBR2	3
BP	GO:0048732	gland development	13/228	430/17653	0.00401947	0.0429612	0.0337046	CAV1/CCNB2/CDO1/CPB2/HOXA5/SOCS2/SOSTDC1/SULF1/TBX3/TCF21/TGFBR2/TGFBR3/TYMS	13
BP	GO:0050769	positive regulation of neurogenesis	13/228	430/17653	0.00401947	0.0429612	0.0337046	AGER/ASPM/CRABP2/CX3CR1/ECT2/FEZ1/NDNF/NEDD4L/PCP4/SEMA5A/SEMA6A/SLIT2/SOCS2	13
BP	GO:0018212	peptidyl-tyrosine modification	12/228	382/17653	0.00416917	0.0443461	0.034791	ANGPT1/CAV1/CD24/CD36/EFEMP1/GHR/GPRC5A/HBEGF/IL6/MELK/SPINK1/TEK	12
BP	GO:0002521	leukocyte differentiation	14/228	483/17653	0.00417465	0.0443461	0.034791	AGER/CA2/CLDN18/FOS/GPC3/HMGB3/IL6/IL7R/ITM2A/KLF6/MMP9/RRAS/TGFBR2/ZBTB16	14
BP	GO:0030195	negative regulation of blood coagulation	4/228	51/17653	0.00421198	0.0444698	0.0348881	CD34/CPB2/EDN1/PROS1	4
BP	GO:1900047	negative regulation of hemostasis	4/228	51/17653	0.00421198	0.0444698	0.0348881	CD34/CPB2/EDN1/PROS1	4
BP	GO:0001763	morphogenesis of a branching structure	8/228	198/17653	0.0042775	0.0450243	0.0353231	EDN1/GPC3/HOXA5/SLIT2/SULF1/TBX3/TCF21/TGFBR2	8
BP	GO:0030335	positive regulation of cell migration	14/228	486/17653	0.00440657	0.0460311	0.036113	ANGPT1/ANXA3/COL1A1/CXCL2/EDN1/HBEGF/IL6/MMP9/S1PR1/SASH1/SEMA5A/SEMA6A/TEK/TGFBR2	14
BP	GO:0050886	endocrine process	5/228	83/17653	0.00441348	0.0460311	0.036113	CPA3/EDN1/MME/RAB11FIP1/TBX3	5
BP	GO:0002063	chondrocyte development	3/228	26/17653	0.00443962	0.0460311	0.036113	COL11A1/SULF1/TGFBR2	3
BP	GO:0042044	fluid transport	3/228	26/17653	0.00443962	0.0460311	0.036113	AQP4/EDN1/EDNRB	3
BP	GO:0042481	regulation of odontogenesis	3/228	26/17653	0.00443962	0.0460311	0.036113	CD34/EDN1/TFAP2A	3
BP	GO:0022612	gland morphogenesis	6/228	119/17653	0.00449243	0.0463482	0.0363618	CAV1/CPB2/SOSTDC1/SULF1/TBX3/TGFBR2	6
BP	GO:0030168	platelet activation	7/228	158/17653	0.00449697	0.0463482	0.0363618	ARRB1/COL1A1/COL3A1/HBB/IL6/MYL9/VWF	7
BP	GO:0022408	negative regulation of cell-cell adhesion	7/228	159/17653	0.00465374	0.0476613	0.0373919	EPCAM/KLF4/LRRC32/RGCC/SCGB1A1/SFTPD/TNFRSF21	7
BP	GO:0002822	regulation of adaptive immune response based on somatic recombination of immune receptors built from immunoglobulin superfamily domains	6/228	120/17653	0.00467909	0.0476613	0.0373919	AGER/C4BPA/IL1RL1/IL33/IL6/IL7R	6
BP	GO:0006805	xenobiotic metabolic process	6/228	120/17653	0.00467909	0.0476613	0.0373919	AOC3/BCHE/CDO1/FMO2/GHR/NQO1	6
BP	GO:0050670	regulation of lymphocyte proliferation	8/228	201/17653	0.00467942	0.0476613	0.0373919	AGER/CD24/IL6/LRRC32/SCGB1A1/SFTPD/TGFBR2/TNFRSF21	8
BP	GO:0032944	regulation of mononuclear cell proliferation	8/228	202/17653	0.00481965	0.0487001	0.0382069	AGER/CD24/IL6/LRRC32/SCGB1A1/SFTPD/TGFBR2/TNFRSF21	8
BP	GO:0001960	negative regulation of cytokine-mediated signaling pathway	4/228	53/17653	0.00483766	0.0487001	0.0382069	CAV1/IL6/MMP12/SLIT2	4
BP	GO:0071398	cellular response to fatty acid	4/228	53/17653	0.00483766	0.0487001	0.0382069	EDN1/LDLR/PDK4/PID1	4
BP	GO:1903428	positive regulation of reactive oxygen species biosynthetic process	4/228	53/17653	0.00483766	0.0487001	0.0382069	CD36/EDN1/HBB/KLF4	4
BP	GO:0045598	regulation of fat cell differentiation	6/228	121/17653	0.00487139	0.0487561	0.0382509	ADIRF/IL6/MMP11/WIF1/ZBTB16/ZFP36	6
BP	GO:0051592	response to calcium ion	6/228	121/17653	0.00487139	0.0487561	0.0382509	CAV1/DUSP1/ECT2/EDN1/FOS/FOSB	6
BP	GO:0071402	cellular response to lipoprotein particle stimulus	3/228	27/17653	0.00494749	0.0489519	0.0384044	CD36/LDLR/LPL	3
BP	GO:0071450	cellular response to oxygen radical	3/228	27/17653	0.00494749	0.0489519	0.0384044	CD36/FBLN5/NQO1	3
BP	GO:0071451	cellular response to superoxide	3/228	27/17653	0.00494749	0.0489519	0.0384044	CD36/FBLN5/NQO1	3
BP	GO:1900101	regulation of endoplasmic reticulum unfolded protein response	3/228	27/17653	0.00494749	0.0489519	0.0384044	AGR2/PPP1R15A/WFS1	3
CC	GO:0031012	extracellular matrix	34/230	479/18698	1.25e-16	3.84e-14	3e-14	ADAMTS1/ANOS1/COL10A1/COL11A1/COL1A1/COL3A1/COMP/CPA3/CRTAC1/DMBT1/EFEMP1/FBLN5/FLRT3/GPC3/IL1RL1/LMCD1/LPL/LRRN3/MFAP4/MMP11/MMP12/MMP9/NDNF/P3H2/SFTPD/SLIT2/SLPI/SPARCL1/SPOCK2/TGFBR3/THBS2/TIMP1/TIMP3/VWF	34
CC	GO:0005578	proteinaceous extracellular matrix	29/230	375/18698	2.83e-15	4.36e-13	3.41e-13	ADAMTS1/ANOS1/COL10A1/COL11A1/COL1A1/COL3A1/COMP/CRTAC1/EFEMP1/FBLN5/FLRT3/GPC3/IL1RL1/LRRN3/MFAP4/MMP11/MMP12/MMP9/NDNF/P3H2/SFTPD/SLIT2/SPARCL1/SPOCK2/TGFBR3/THBS2/TIMP1/TIMP3/VWF	29
CC	GO:0045121	membrane raft	17/230	302/18698	2.17e-07	1.75e-05	1.37e-05	ANGPT1/CAV1/CAVIN1/CAVIN2/CD24/CD36/EDNRB/GPM6B/OLR1/PECAM1/PLLP/S1PR1/SLC2A1/SLC6A4/SULF1/TEK/TGFBR2	17
CC	GO:0098857	membrane microdomain	17/230	303/18698	2.27e-07	1.75e-05	1.37e-05	ANGPT1/CAV1/CAVIN1/CAVIN2/CD24/CD36/EDNRB/GPM6B/OLR1/PECAM1/PLLP/S1PR1/SLC2A1/SLC6A4/SULF1/TEK/TGFBR2	17
CC	GO:0098589	membrane region	17/230	314/18698	3.76e-07	2.31e-05	1.81e-05	ANGPT1/CAV1/CAVIN1/CAVIN2/CD24/CD36/EDNRB/GPM6B/OLR1/PECAM1/PLLP/S1PR1/SLC2A1/SLC6A4/SULF1/TEK/TGFBR2	17
CC	GO:0044420	extracellular matrix component	10/230	119/18698	2.15e-06	0.000110531	8.65e-05	ADAMTS1/COL11A1/COL1A1/COL3A1/FBLN5/MFAP4/P3H2/THBS2/TIMP1/TIMP3	10
CC	GO:0009897	external side of plasma membrane	14/230	287/18698	1.35e-05	0.000582008	0.000455502	AQP4/CA4/CD24/CD34/CD36/CDH5/CEACAM5/HEG1/IL1RL1/IL7R/LDLR/S1PR1/TGFBR2/TGFBR3	14
CC	GO:0031091	platelet alpha granule	8/230	90/18698	1.51e-05	0.000582008	0.000455502	A2M/CD36/PECAM1/PHACTR2/PROS1/THBS2/TIMP1/VWF	8
CC	GO:0005788	endoplasmic reticulum lumen	14/230	297/18698	1.98e-05	0.000677589	0.000530308	BCHE/COL10A1/COL11A1/COL1A1/COL3A1/EDN1/GOLM1/GPC3/IL6/P3H2/SPARCL1/SPP1/TIMP1/WFS1	14
CC	GO:0042599	lamellar body	4/230	19/18698	7.48e-05	0.00230287	0.00180231	ABCA3/LAMP3/SFTPC/SFTPD	4
CC	GO:0030667	secretory granule membrane	13/230	303/18698	0.00010219	0.00272122	0.00212973	ABCA3/CA4/CAV1/CD36/CD93/DMBT1/DSP/LAMP3/MME/OLR1/PECAM1/PHACTR2/PTPRB	13
CC	GO:0005581	collagen trimer	7/230	88/18698	0.000106022	0.00272122	0.00212973	COL10A1/COL11A1/COL1A1/COL3A1/FCN3/MARCO/SFTPD	7
CC	GO:0016323	basolateral plasma membrane	10/230	210/18698	0.000283442	0.0067154	0.00525573	AQP4/ARRB1/CA2/CD34/CEACAM5/DSP/EPCAM/LDLR/SLC2A1/TEK	10
CC	GO:0005583	fibrillar collagen trimer	3/230	12/18698	0.000372331	0.00728673	0.00570288	COL11A1/COL1A1/COL3A1	3
CC	GO:0098643	banded collagen fibril	3/230	12/18698	0.000372331	0.00728673	0.00570288	COL11A1/COL1A1/COL3A1	3
CC	GO:0005911	cell-cell junction	15/230	440/18698	0.000378532	0.00728673	0.00570288	CDH3/CDH5/CLDN18/DES/DSP/ECT2/EPCAM/FLRT3/HEG1/JAM2/PDZD2/SLC2A1/STXBP6/TEK/TMEM47	15
CC	GO:0005902	microvillus	6/230	83/18698	0.00055638	0.0100803	0.00788923	ANGPT1/AOC3/CA2/ICAM2/S100P/TEK	6
CC	GO:0043235	receptor complex	13/230	374/18698	0.00077244	0.0132173	0.0103444	CALCRL/CD36/GHR/IL6/LDLR/OLR1/PTPRB/RAMP2/RAMP3/TEK/TGFBR2/TGFBR3/VIPR1	13
CC	GO:0042581	specific granule	8/230	160/18698	0.000834585	0.0133842	0.010475	ANXA3/CD36/CD93/LCN2/OLR1/PTPRB/SLPI/TCN1	8
CC	GO:0030666	endocytic vesicle membrane	8/230	161/18698	0.000869102	0.0133842	0.010475	ANXA3/CAV1/CD36/DMBT1/HBEGF/LDLR/MARCO/RAB11FIP1	8
CC	GO:0030139	endocytic vesicle	11/230	290/18698	0.000967051	0.0137141	0.0107332	ANXA3/CAV1/CD36/DMBT1/HBB/HBEGF/LDLR/MARCO/RAB11FIP1/SFTPC/SFTPD	11
CC	GO:0070820	tertiary granule	8/230	164/18698	0.000979581	0.0137141	0.0107332	CD93/DSP/HBB/METTL7A/MMP9/OLR1/PTPRB/TCN1	8
CC	GO:0031092	platelet alpha granule membrane	3/230	17/18698	0.00109971	0.0146408	0.0114584	CD36/PECAM1/PHACTR2	3
CC	GO:0005938	cell cortex	11/230	296/18698	0.00114084	0.0146408	0.0114584	CAV1/CLIC5/COL10A1/EPB41L2/FERMT2/MELK/MYH10/NEDD9/SLC2A1/SPTBN1/STXBP6	11
CC	GO:0098644	complex of collagen trimers	3/230	20/18698	0.00179415	0.0221039	0.0172993	COL11A1/COL1A1/COL3A1	3
CC	GO:0072562	blood microparticle	8/230	183/18698	0.00196709	0.0227731	0.0178231	A2M/BCHE/C4BPA/CFB/FCN3/HBB/PROS1/SLC2A1	8
CC	GO:0045177	apical part of cell	12/230	366/18698	0.00199634	0.0227731	0.0178231	AGER/ASPM/CA2/CA4/CD34/CD36/DUOX1/EPCAM/LDLR/SLC2A1/SLC7A5/TEK	12
CC	GO:0031233	intrinsic component of external side of plasma membrane	3/230	23/18698	0.00271255	0.0291707	0.0228301	CA4/CD24/CEACAM5	3
CC	GO:0005901	caveola	5/230	78/18698	0.0027466	0.0291707	0.0228301	CAV1/CAVIN1/CAVIN2/SLC2A1/TGFBR2	5
CC	GO:0000922	spindle pole	7/230	153/18698	0.00289187	0.0296899	0.0232365	ASPM/CDC20/CENPF/EML1/NEDD9/PRC1/TPX2	7
CC	GO:0060205	cytoplasmic vesicle lumen	11/230	338/18698	0.0032163	0.0316572	0.0247761	A2M/CAT/HBB/LCN2/PROS1/S100P/SLPI/TCN1/TIMP1/TIMP3/VWF	11
CC	GO:0031983	vesicle lumen	11/230	339/18698	0.00328906	0.0316572	0.0247761	A2M/CAT/HBB/LCN2/PROS1/S100P/SLPI/TCN1/TIMP1/TIMP3/VWF	11
CC	GO:0016324	apical plasma membrane	10/230	300/18698	0.00413218	0.038567	0.030184	AGER/ASPM/CA4/CD34/CD36/DUOX1/EPCAM/SLC2A1/SLC7A5/TEK	10
CC	GO:0030496	midbody	7/230	166/18698	0.00452888	0.0409804	0.0320728	ASPM/CENPF/ECT2/MYH10/PRC1/SLC2A1/TACC1	7
CC	GO:1904724	tertiary granule lumen	4/230	55/18698	0.00465686	0.0409804	0.0320728	HBB/METTL7A/MMP9/TCN1	4
CC	GO:0005604	basement membrane	5/230	92/18698	0.00557286	0.0476789	0.0373153	ADAMTS1/P3H2/THBS2/TIMP1/TIMP3	5
MF	GO:0005539	glycosaminoglycan binding	15/220	215/17548	9.09e-08	4.28e-05	3.68e-05	ADAMTS1/AGER/ANOS1/COMP/HBEGF/LPL/LYVE1/NDNF/PCOLCE2/SEMA5A/SLIT2/SPOCK2/TGFBR2/TGFBR3/THBS2	15
MF	GO:1901681	sulfur compound binding	15/220	235/17548	2.89e-07	6.81e-05	5.86e-05	ACADL/ADAMTS1/AGER/ANOS1/CD34/COMP/GPC3/HBEGF/LPL/NDNF/PCOLCE2/SEMA5A/SLIT2/TGFBR3/THBS2	15
MF	GO:0033218	amide binding	16/220	308/17548	1.81e-06	0.000226273	0.000194693	AGER/BCHE/CALCRL/CD36/CRYAB/EDNRB/GHR/ITM2A/KDELR3/LDLR/MARCO/MME/RAMP2/SLC7A5/TYMS/VIPR1	16
MF	GO:0042277	peptide binding	15/220	273/17548	1.92e-06	0.000226273	0.000194693	AGER/BCHE/CALCRL/CD36/CRYAB/EDNRB/GHR/ITM2A/KDELR3/LDLR/MARCO/MME/RAMP2/SLC7A5/VIPR1	15
MF	GO:0061134	peptidase regulator activity	13/220	218/17548	3.88e-06	0.000365114	0.000314156	A2M/ANOS1/ARRB1/CAV1/CST1/GPC3/PCOLCE2/PROS1/SLPI/SPINK1/SPOCK2/TIMP1/TIMP3	13
MF	GO:0008201	heparin binding	11/220	158/17548	5.02e-06	0.000394277	0.000339249	ADAMTS1/AGER/ANOS1/COMP/HBEGF/LPL/NDNF/PCOLCE2/SLIT2/TGFBR3/THBS2	11
MF	GO:0001540	amyloid-beta binding	7/220	57/17548	6.87e-06	0.000462316	0.000397791	AGER/BCHE/CD36/CRYAB/ITM2A/LDLR/MARCO	7
MF	GO:0004857	enzyme inhibitor activity	17/220	397/17548	1.14e-05	0.00066859	0.000575276	A2M/ANOS1/ANXA3/ARRB1/CST1/FLRT3/GPC3/PHACTR2/PROS1/SCGB1A1/SLIT2/SLPI/SOCS2/SPINK1/SPOCK2/TIMP1/TIMP3	17
MF	GO:0030414	peptidase inhibitor activity	11/220	182/17548	1.92e-05	0.00100515	0.000864862	A2M/ANOS1/ARRB1/CST1/GPC3/PROS1/SLPI/SPINK1/SPOCK2/TIMP1/TIMP3	11
MF	GO:0050840	extracellular matrix binding	6/220	52/17548	4.56e-05	0.00180903	0.00155655	COL11A1/DMBT1/SLIT2/SPARCL1/SPOCK2/SPP1	6
MF	GO:0019955	cytokine binding	8/220	103/17548	4.6e-05	0.00180903	0.00155655	A2M/CD36/CX3CR1/IL1RL1/SOSTDC1/TGFBR2/TGFBR3/ZFP36	8
MF	GO:0002020	protease binding	9/220	133/17548	4.61e-05	0.00180903	0.00155655	A2M/COL1A1/COL3A1/COMP/CST1/LDLR/TIMP1/TIMP3/VWF	9
MF	GO:0004866	endopeptidase inhibitor activity	10/220	173/17548	6.71e-05	0.00243157	0.0020922	A2M/ANOS1/ARRB1/CST1/PROS1/SLPI/SPINK1/SPOCK2/TIMP1/TIMP3	10
MF	GO:0061135	endopeptidase regulator activity	10/220	179/17548	8.92e-05	0.00280697	0.0024152	A2M/ANOS1/ARRB1/CST1/PROS1/SLPI/SPINK1/SPOCK2/TIMP1/TIMP3	10
MF	GO:0048306	calcium-dependent protein binding	6/220	59/17548	9.39e-05	0.00280697	0.0024152	A2M/ANXA3/DMBT1/S100P/TNNC1/WFS1	6
MF	GO:0038024	cargo receptor activity	7/220	85/17548	9.54e-05	0.00280697	0.0024152	AGER/ARRB1/CD36/DMBT1/LDLR/MARCO/TMPRSS4	7
MF	GO:0005518	collagen binding	6/220	63/17548	0.000135814	0.00376284	0.00323767	COMP/MMP12/MMP9/PCOLCE2/SPARCL1/VWF	6
MF	GO:0017046	peptide hormone binding	5/220	42/17548	0.000172548	0.004515	0.00388485	CALCRL/EDNRB/GHR/RAMP2/VIPR1	5
MF	GO:0019838	growth factor binding	8/220	133/17548	0.000275141	0.00682059	0.00586865	A2M/CD36/COL1A1/COL3A1/DUSP1/TEK/TGFBR2/TGFBR3	8
MF	GO:0046332	SMAD binding	6/220	74/17548	0.0003303	0.00777856	0.00669292	COL3A1/FOS/RGCC/SMAD6/TGFBR2/TGFBR3	6
MF	GO:0005080	protein kinase C binding	5/220	50/17548	0.000396225	0.00888676	0.00764645	CAVIN2/DSP/FEZ1/GRK5/TOP2A	5
MF	GO:0005044	scavenger receptor activity	5/220	54/17548	0.000567907	0.0121584	0.0104614	AGER/CD36/DMBT1/MARCO/TMPRSS4	5
MF	GO:0008191	metalloendopeptidase inhibitor activity	3/220	15/17548	0.000791251	0.0162034	0.0139419	SPOCK2/TIMP1/TIMP3	3
MF	GO:0004675	transmembrane receptor protein serine/threonine kinase activity	3/220	17/17548	0.00116085	0.0210293	0.0180942	SOSTDC1/TGFBR2/TGFBR3	3
MF	GO:0008329	signaling pattern recognition receptor activity	3/220	17/17548	0.00116085	0.0210293	0.0180942	CD36/DMBT1/MARCO	3
MF	GO:0038187	pattern recognition receptor activity	3/220	17/17548	0.00116085	0.0210293	0.0180942	CD36/DMBT1/MARCO	3
MF	GO:0043394	proteoglycan binding	4/220	38/17548	0.00127034	0.0221605	0.0190676	COMP/GPC3/SEMA5A/SLIT2	4
MF	GO:0050431	transforming growth factor beta binding	3/220	19/17548	0.00162393	0.0273167	0.0235042	CD36/TGFBR2/TGFBR3	3
MF	GO:0043395	heparan sulfate proteoglycan binding	3/220	20/17548	0.00189295	0.030744	0.0264531	COMP/GPC3/SEMA5A	3
MF	GO:0005201	extracellular matrix structural constituent	5/220	77/17548	0.00281252	0.0434609	0.0373951	ANOS1/COL11A1/COL1A1/COL3A1/COMP	5
MF	GO:0070412	R-SMAD binding	3/220	23/17548	0.00286048	0.0434609	0.0373951	FOS/RGCC/SMAD6	3
MF	GO:0005160	transforming growth factor beta receptor binding	4/220	49/17548	0.00327558	0.0467514	0.0402264	GDF15/SMAD6/TGFBR2/TGFBR3	4
MF	GO:0016684	oxidoreductase activity, acting on peroxide as acceptor	4/220	49/17548	0.00327558	0.0467514	0.0402264	CAT/DUOX1/HBB/SESN1	4
MF	GO:0050839	cell adhesion molecule binding	14/220	489/17548	0.00357071	0.0490801	0.0422301	CCNB2/CDH3/CDH5/COL3A1/CTNNAL1/DSP/EPCAM/FBLN5/GPRC5A/ICAM2/S100P/SPTBN1/STXBP6/VWF	14
MF	GO:0019956	chemokine binding	3/220	25/17548	0.00364714	0.0490801	0.0422301	A2M/CX3CR1/ZFP36	3
